# Supplementary material
Source: PubMed Central journal article supplement (PMC3272584)
Supplement: NIHMS337733-supplement-01.pdf [file NIHMS337733-supplement-01.pdf]

# Marine sponge *Hymeniacidon* sp. amphilectane metabolites potently inhibit rat brain microglia thromboxane B2 generation

Alejandro M. S. Mayer,<sup>a</sup> Edward Avilés,<sup>b</sup> and Abimael D. Rodríguez<sup>b,\*</sup>

<sup>a</sup>*Department of Pharmacology, Chicago College of Osteopathic Medicine, Midwestern University, 555 31st Street, Downers Grove, Illinois 60515, USA and*

<sup>b</sup>*Department of Chemistry, University of Puerto Rico, P.O. Box 23346, UPR Station, San Juan, Puerto Rico 00931-3346, USA*

## Supporting Material

|                                                                                                               | <b>Page</b> |
|---------------------------------------------------------------------------------------------------------------|-------------|
| (1) <sup>1</sup> H (500 MHz)- and <sup>13</sup> C (125 MHz)-NMR spectra of compounds 1–7 in CDCl <sub>3</sub> | 2–16        |
| (2) Figure 2                                                                                                  | 17          |

$^1\text{H-NMR}$  (500 MHz) of compound 1 in  $\text{CDCl}_3$

2

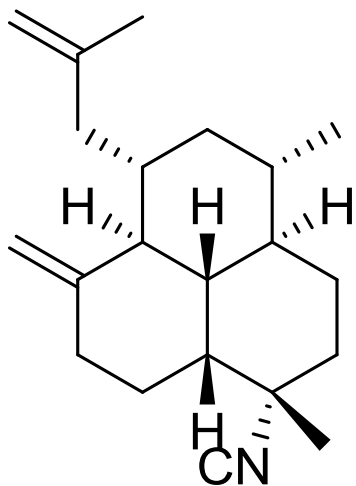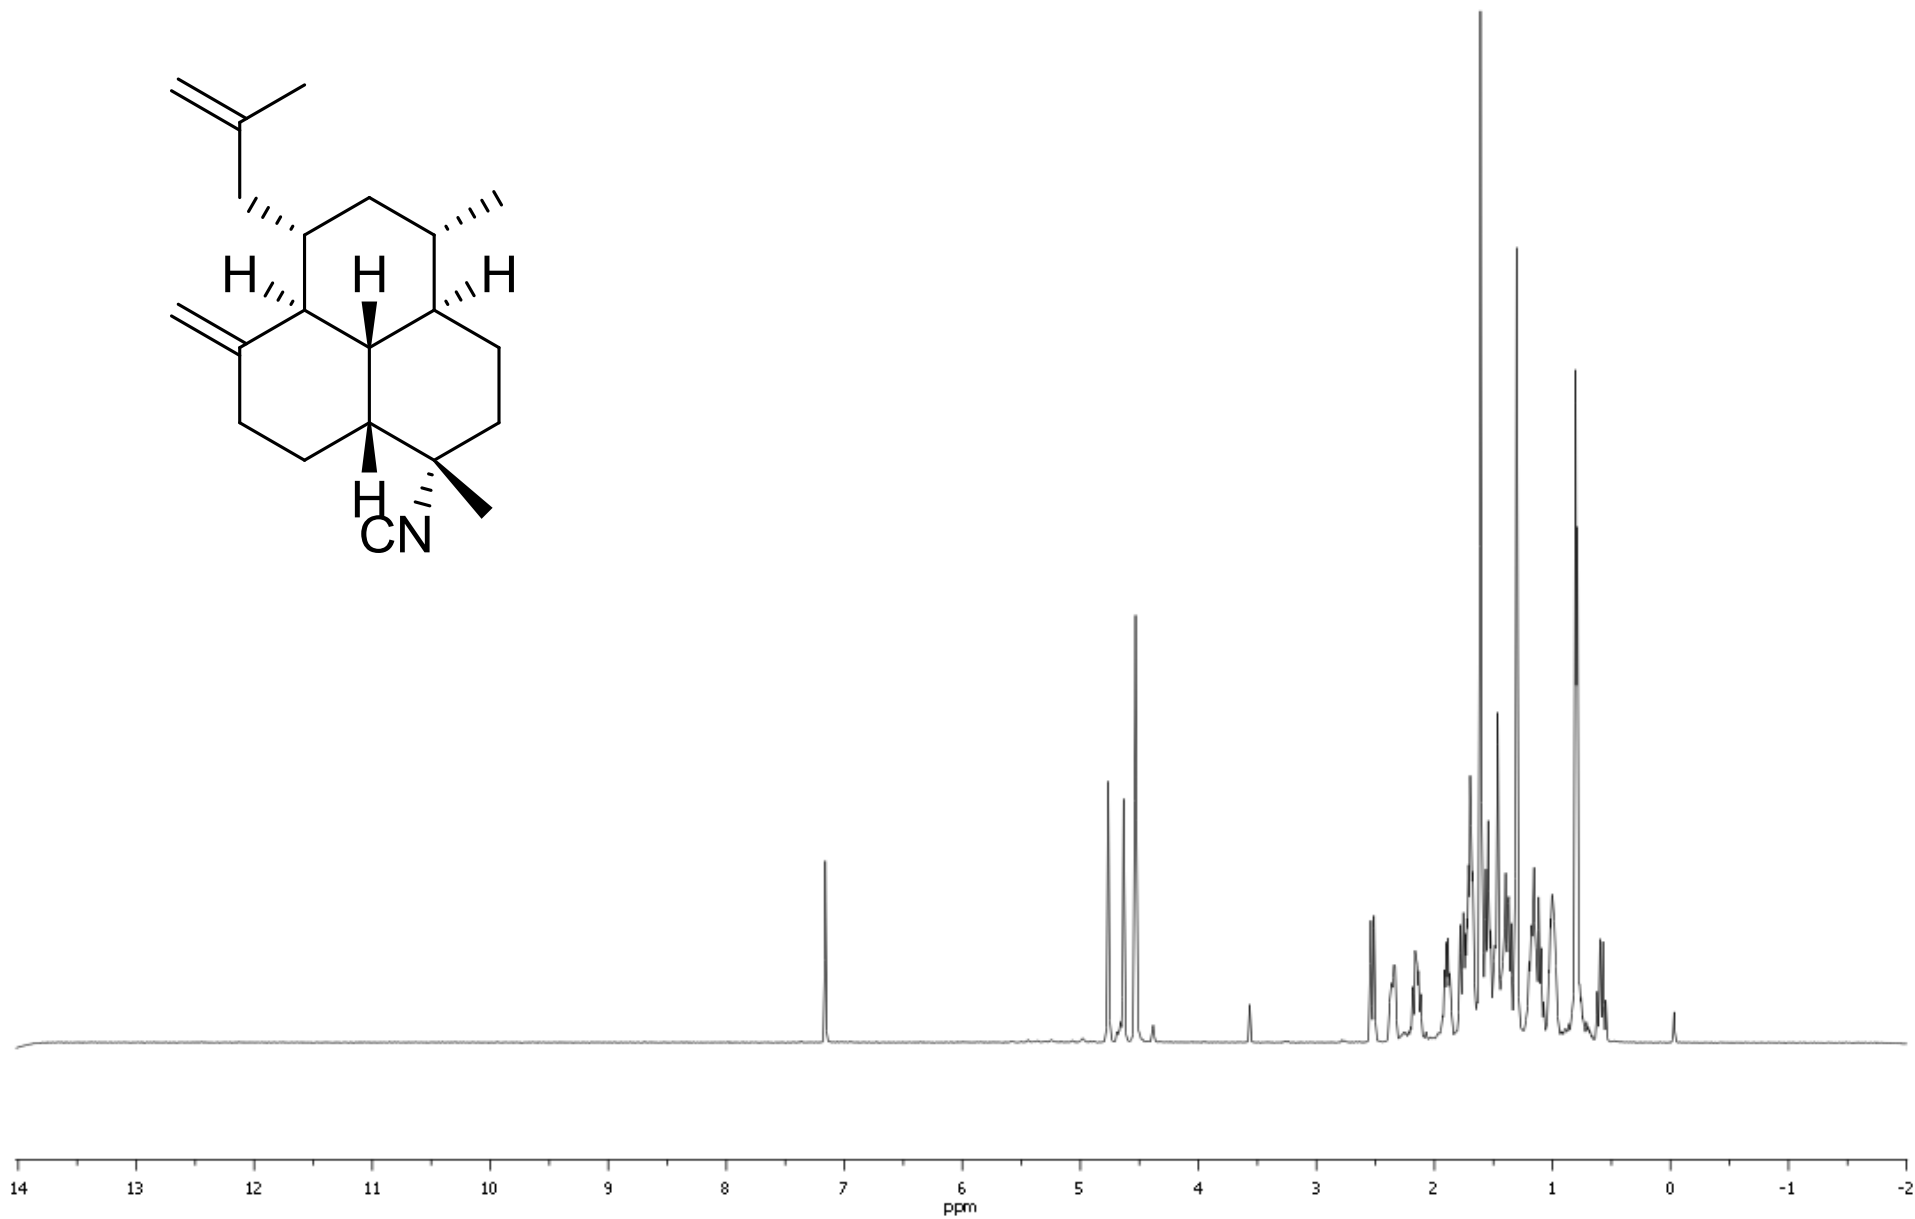

$^{13}\text{C}$ -NMR (125 MHz) spectrum of compound 1 in  $\text{CDCl}_3$

3

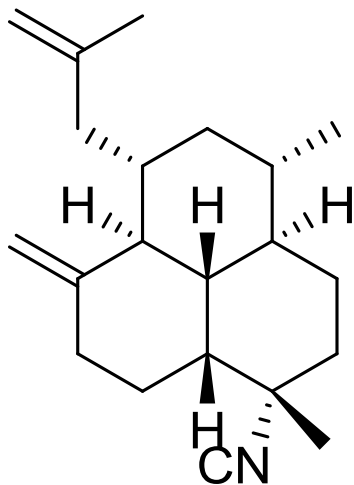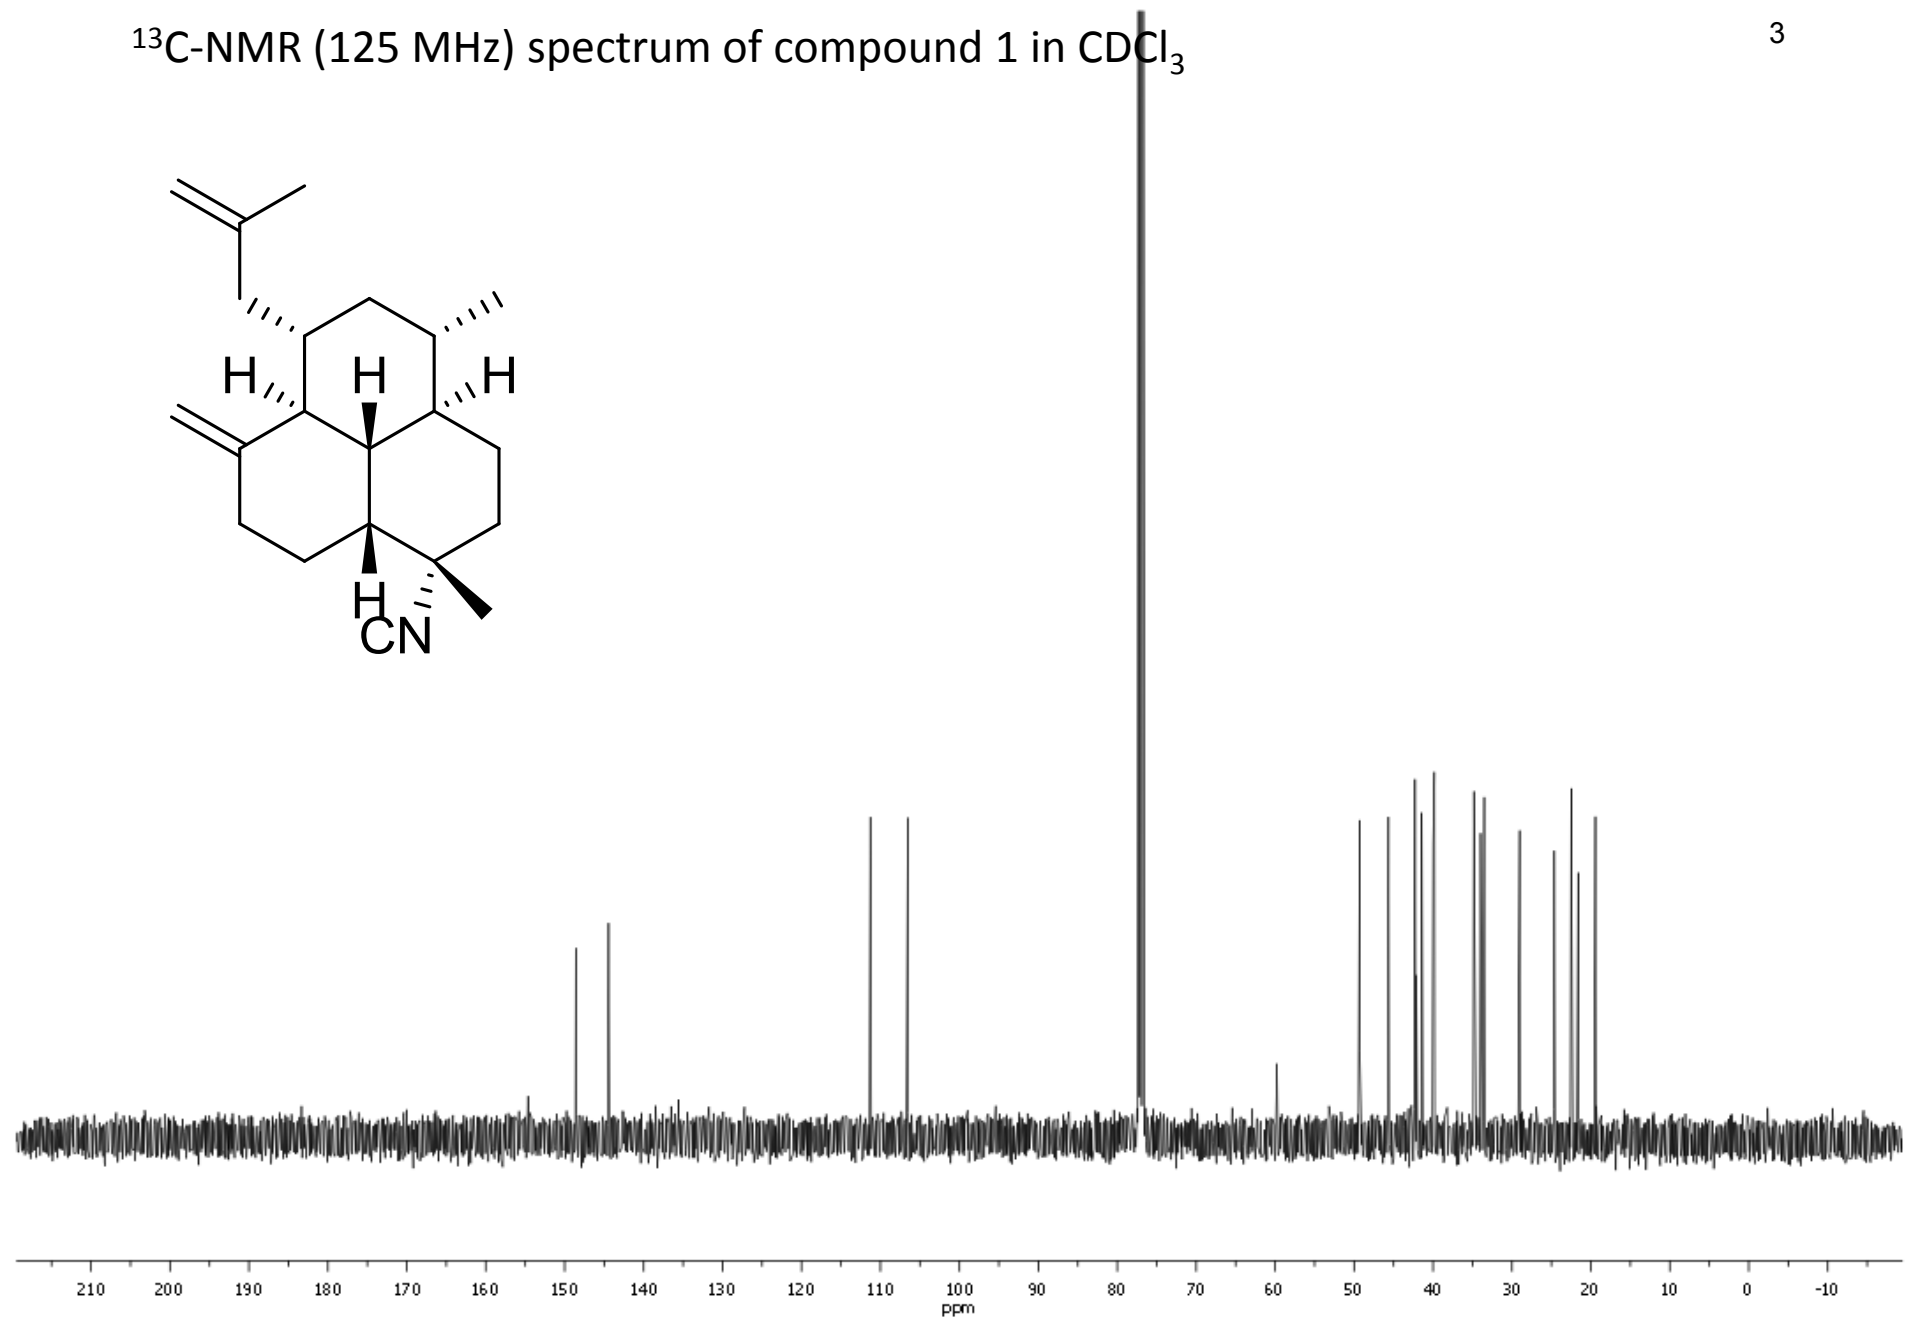

$^1\text{H-NMR}$  (500 MHz) of compound 2 in  $\text{CDCl}_3$

4

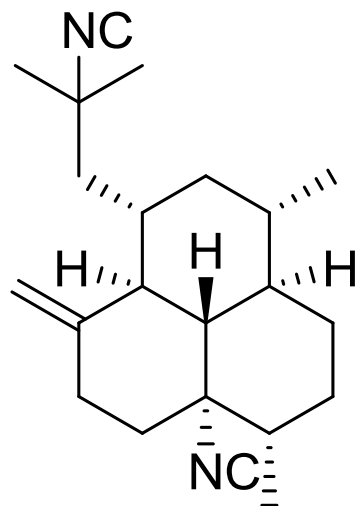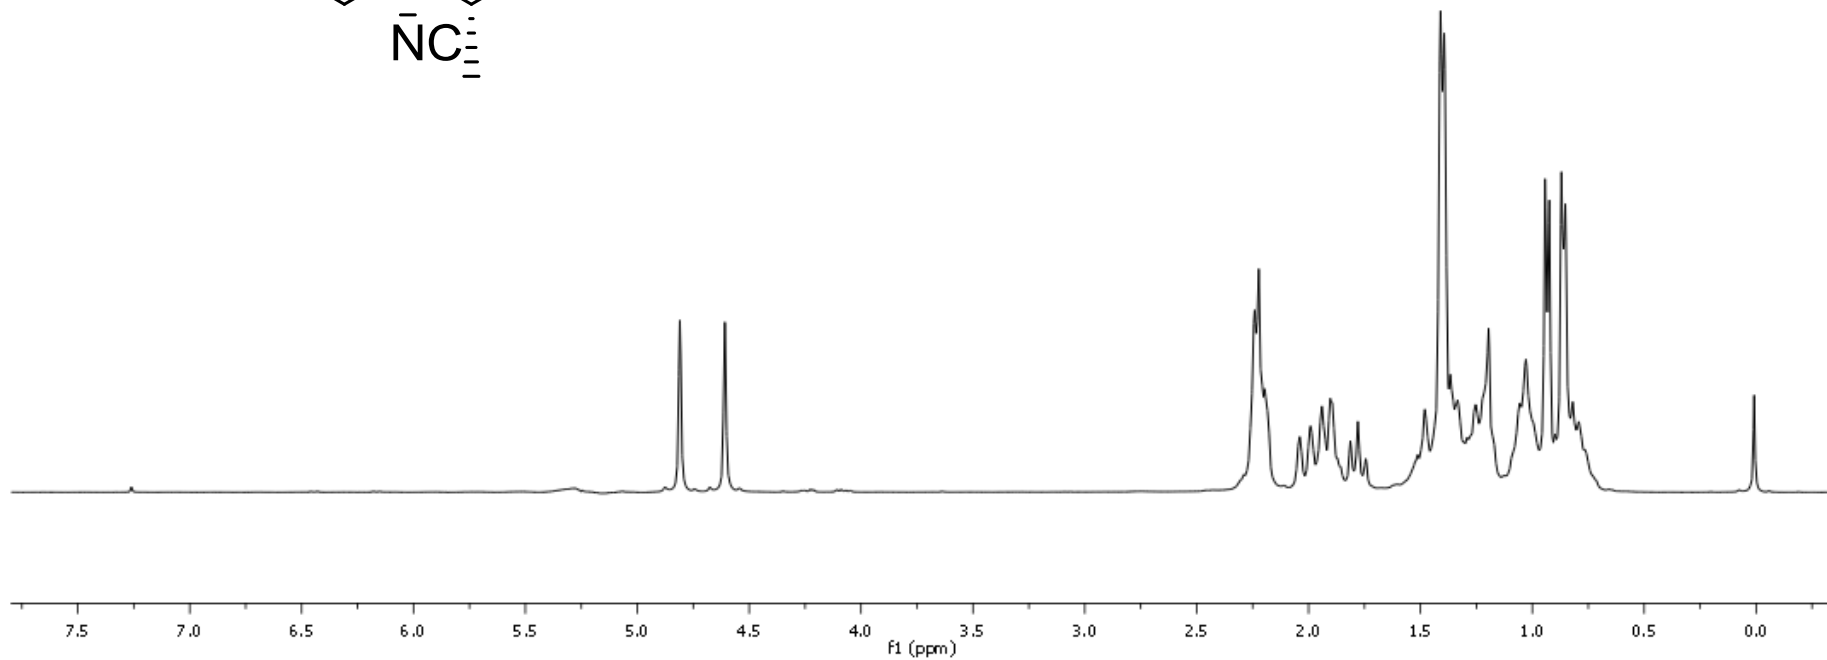

$^{13}\text{C}$ -NMR (125 MHz) spectrum of compound 2 in  $\text{CDCl}_3$

5

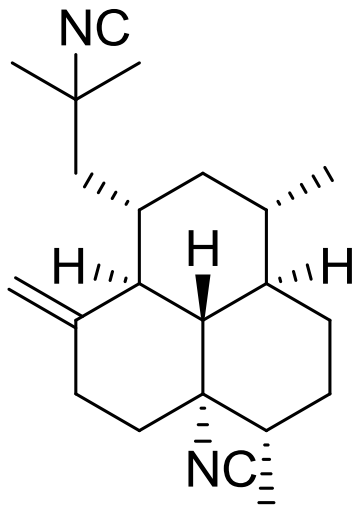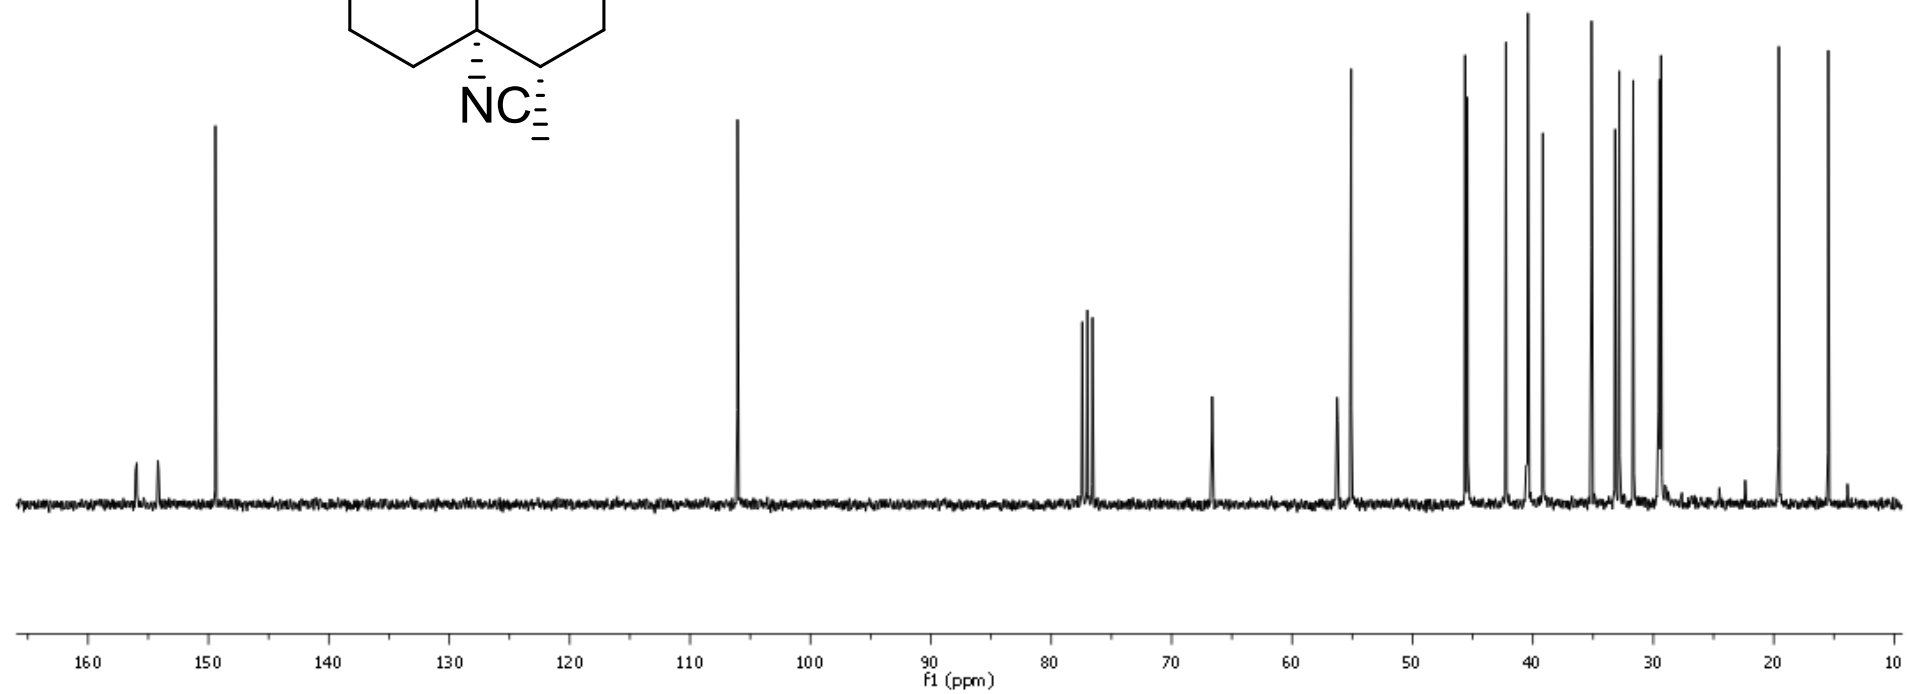

$^1\text{H-NMR}$  (500 MHz) of compound 3 in  $\text{CDCl}_3$

6

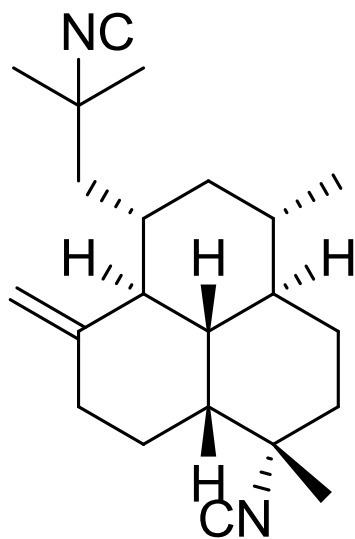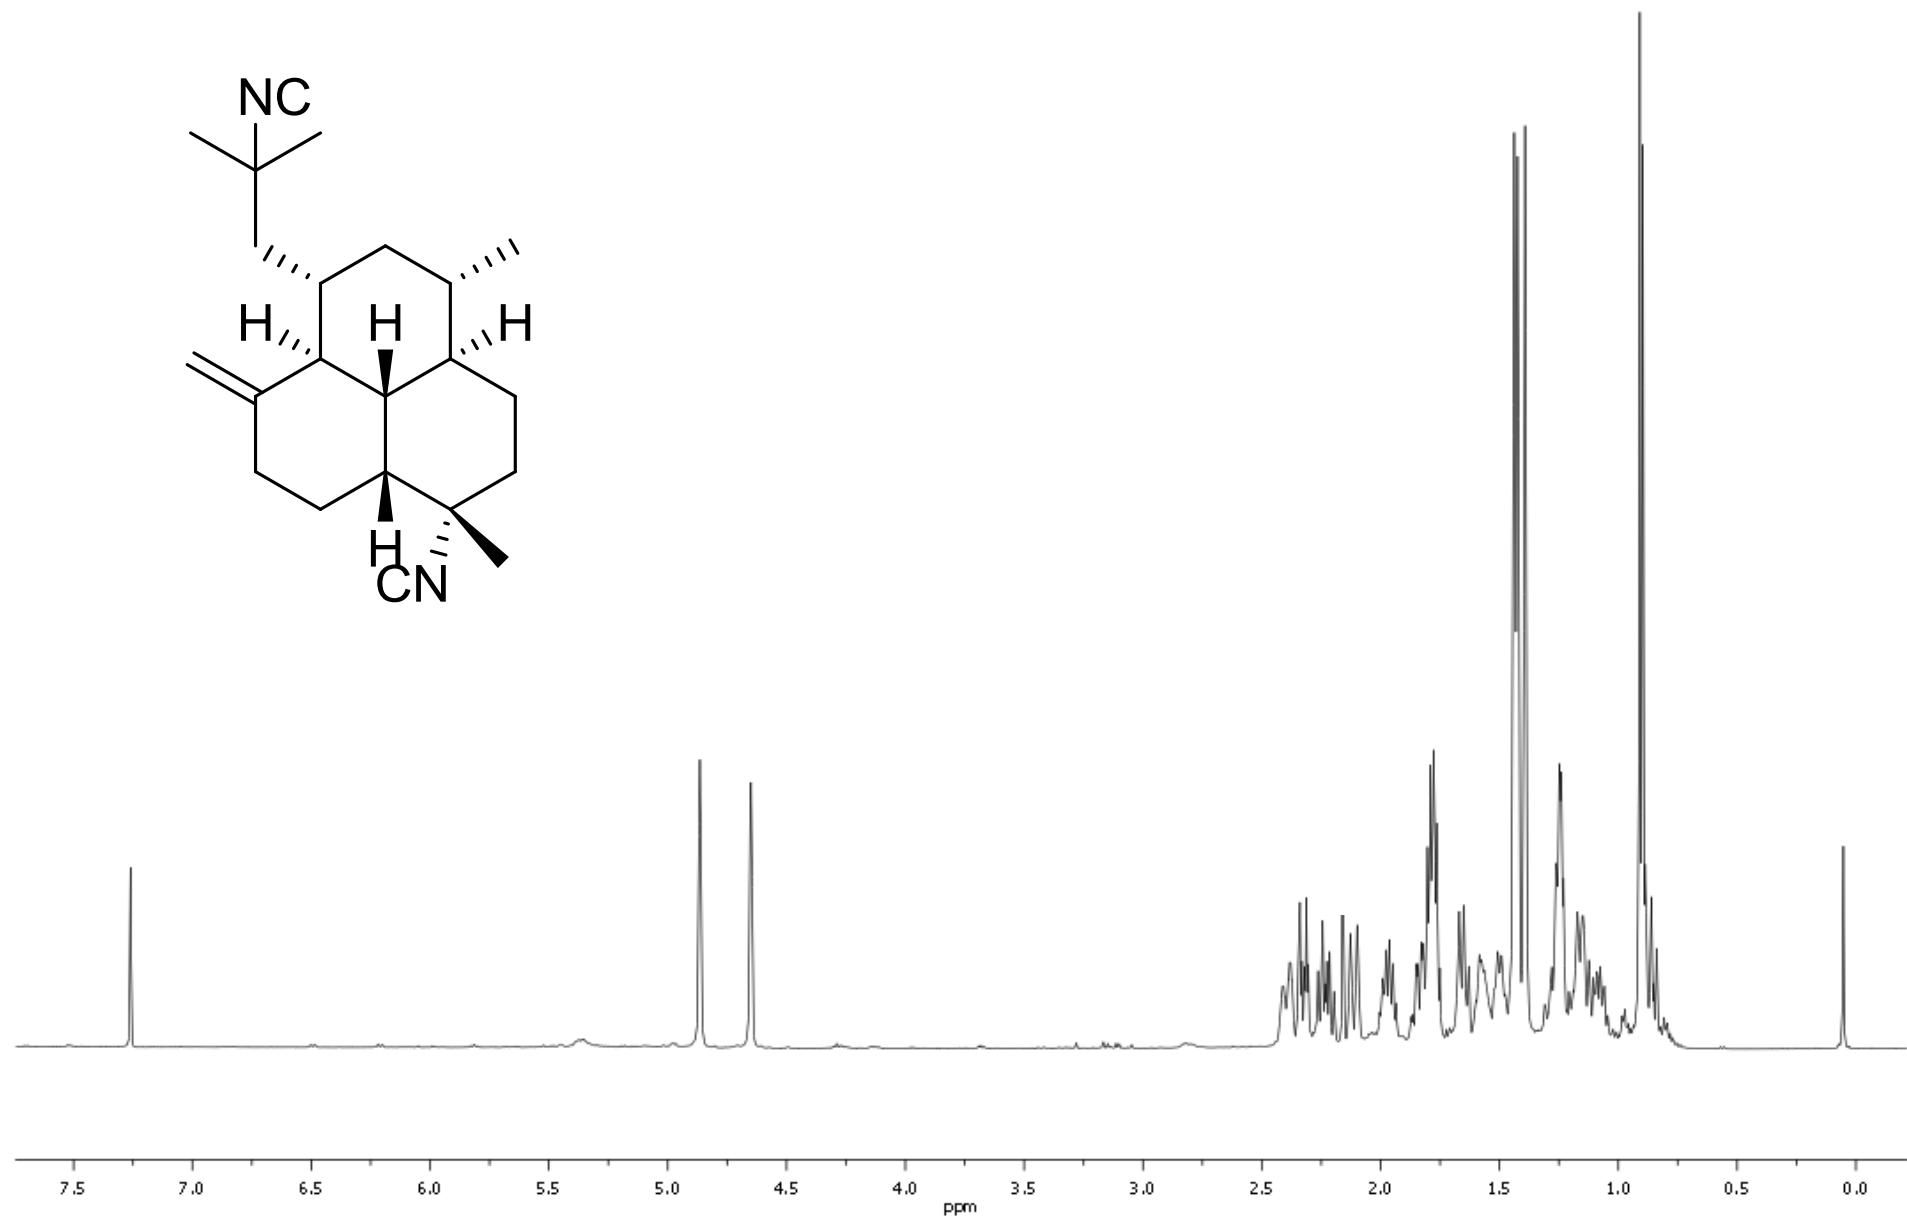

$^{13}\text{C}$ -NMR (125 MHz) spectrum of compound 3 in  $\text{CDCl}_3$

7

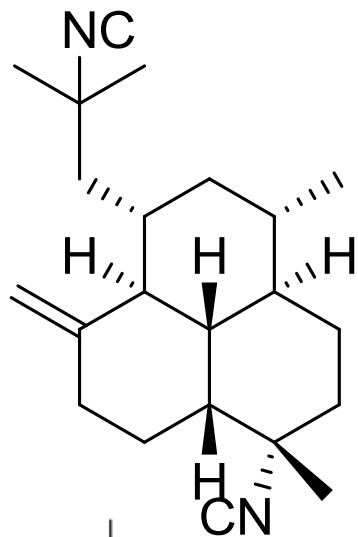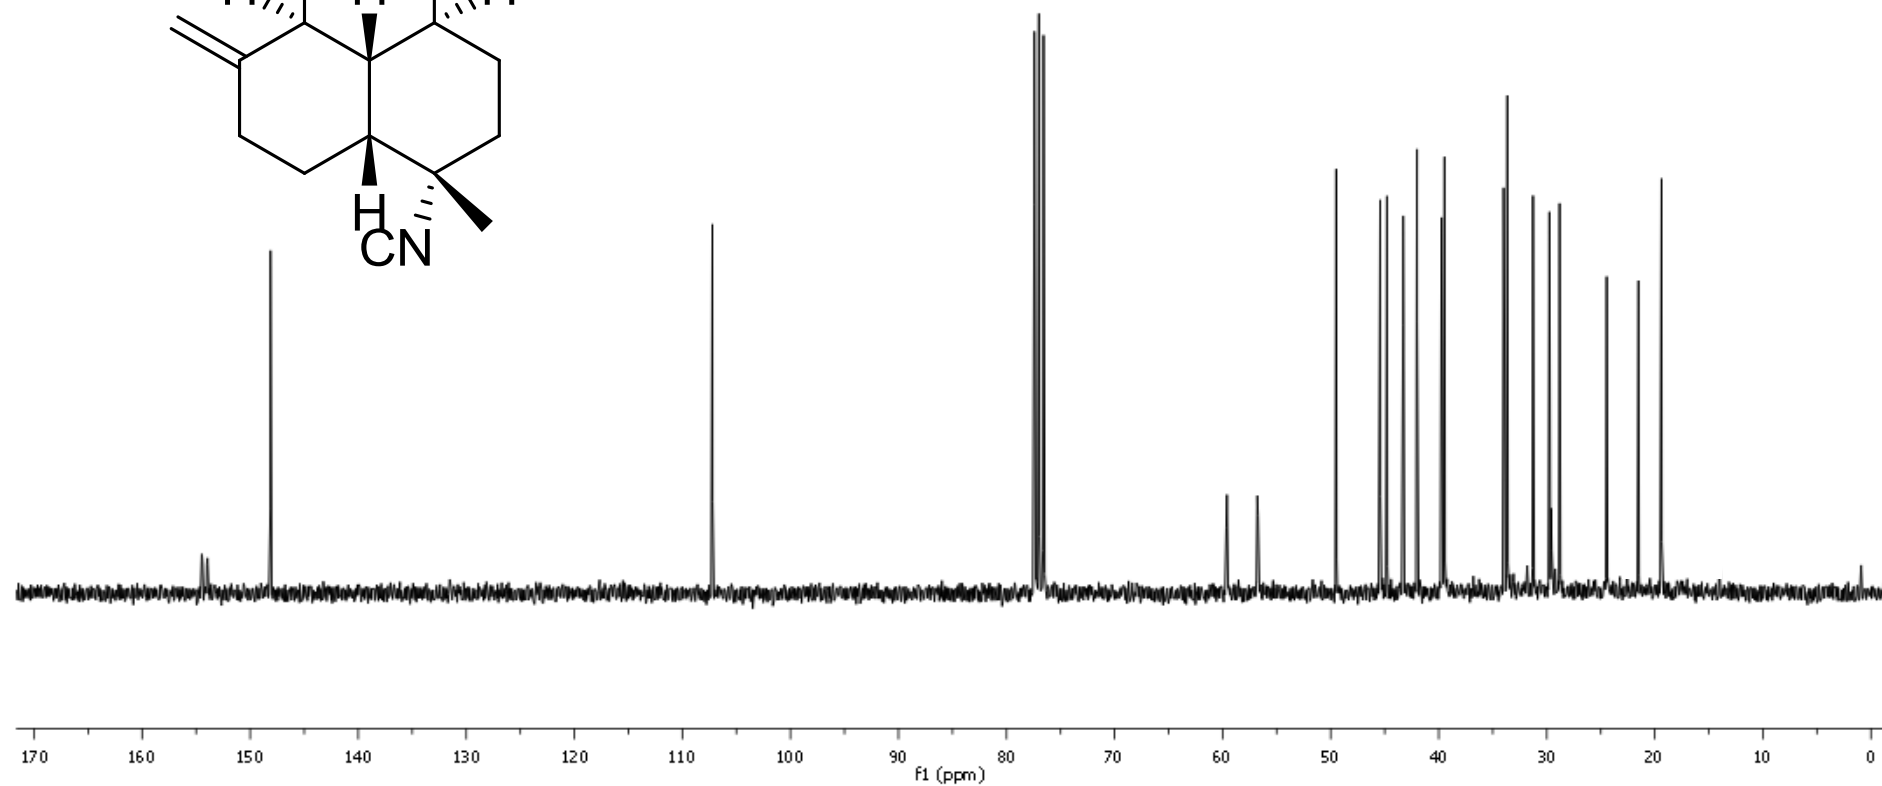

$^1\text{H-NMR}$  (500 MHz) of compound 4 in  $\text{CDCl}_3$

8

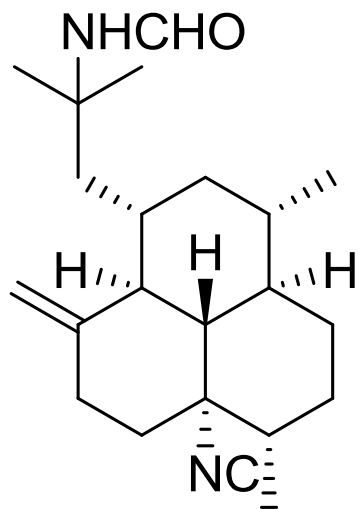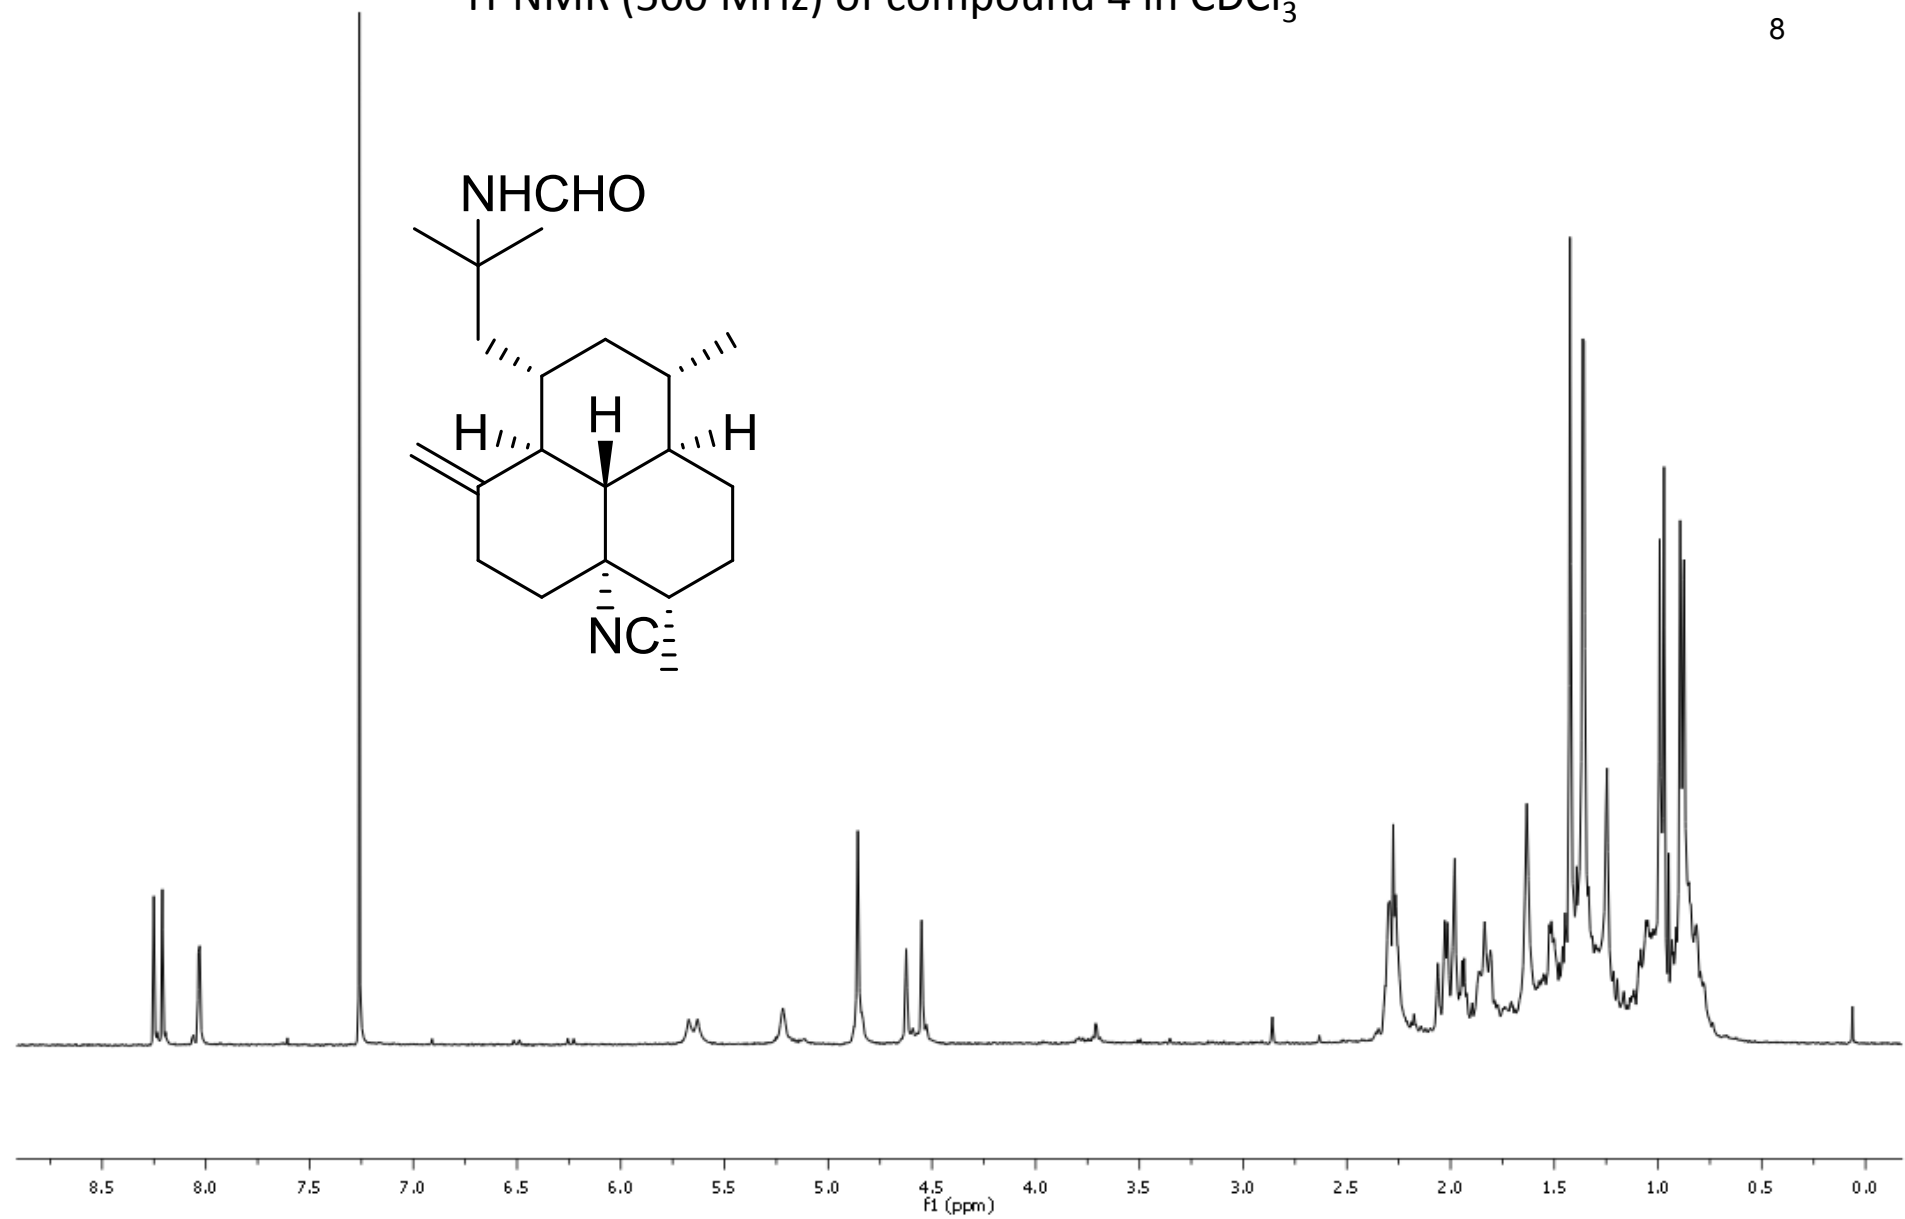



$^{13}\text{C}$ -NMR (125 MHz) spectrum of compound 4 in  $\text{CDCl}_3$

9

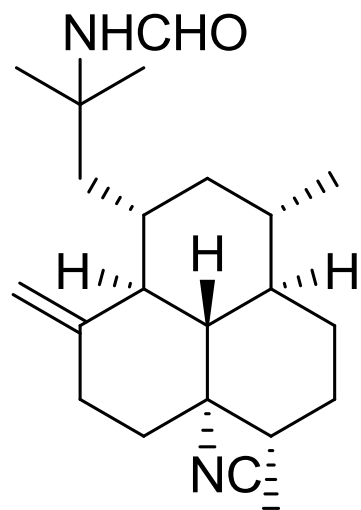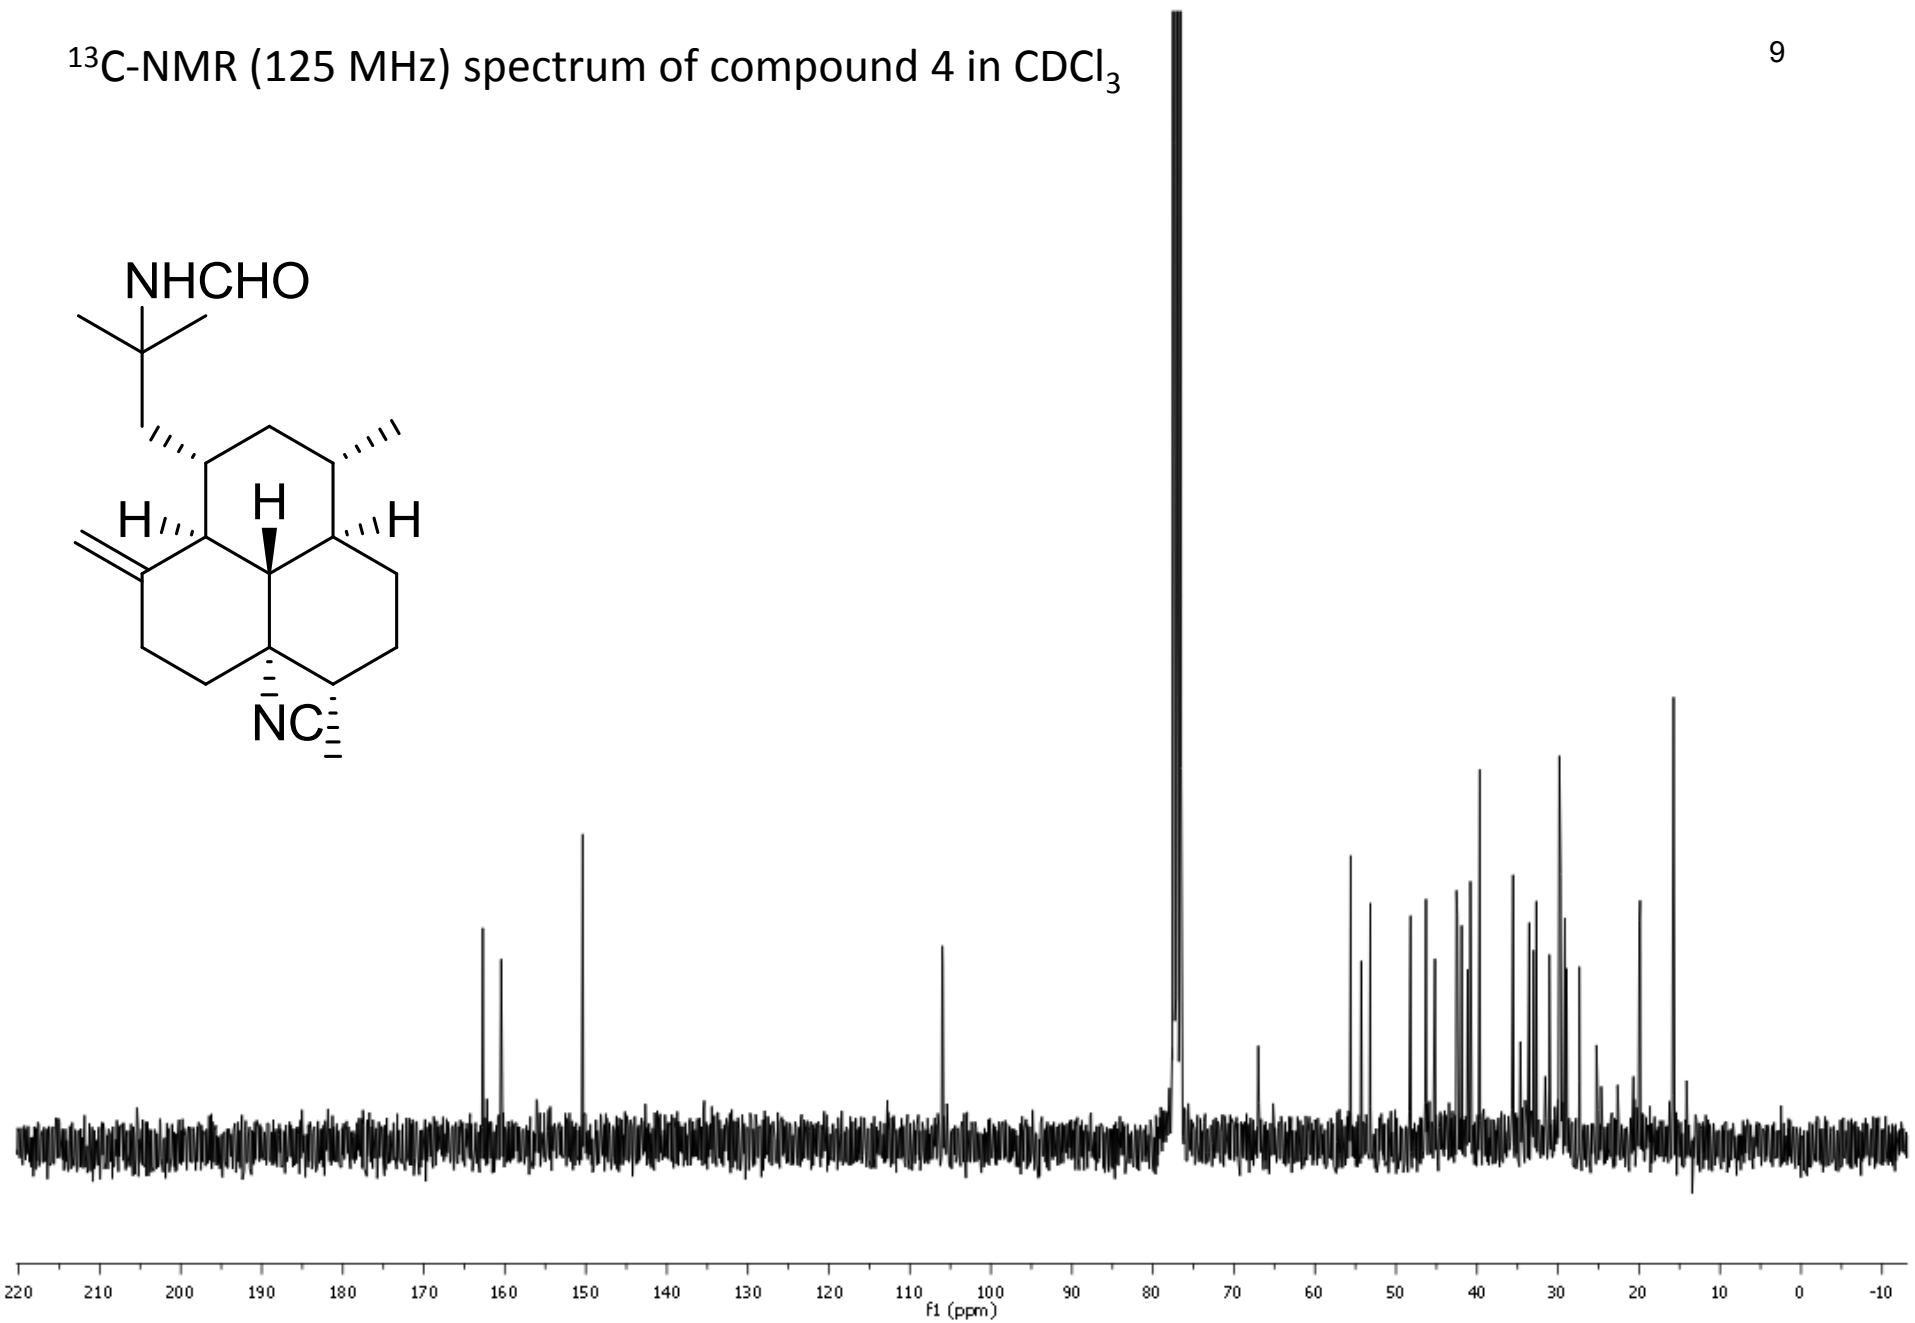

$^1\text{H-NMR}$  (500 MHz) of compound 5 in  $\text{CDCl}_3$

10

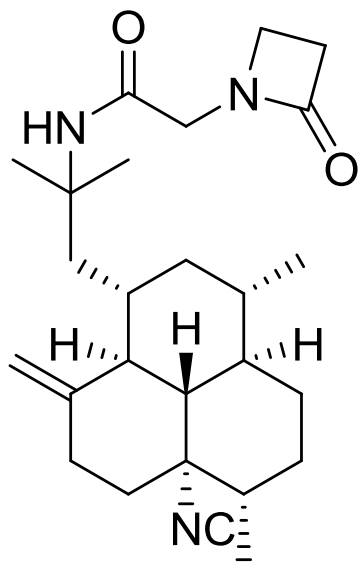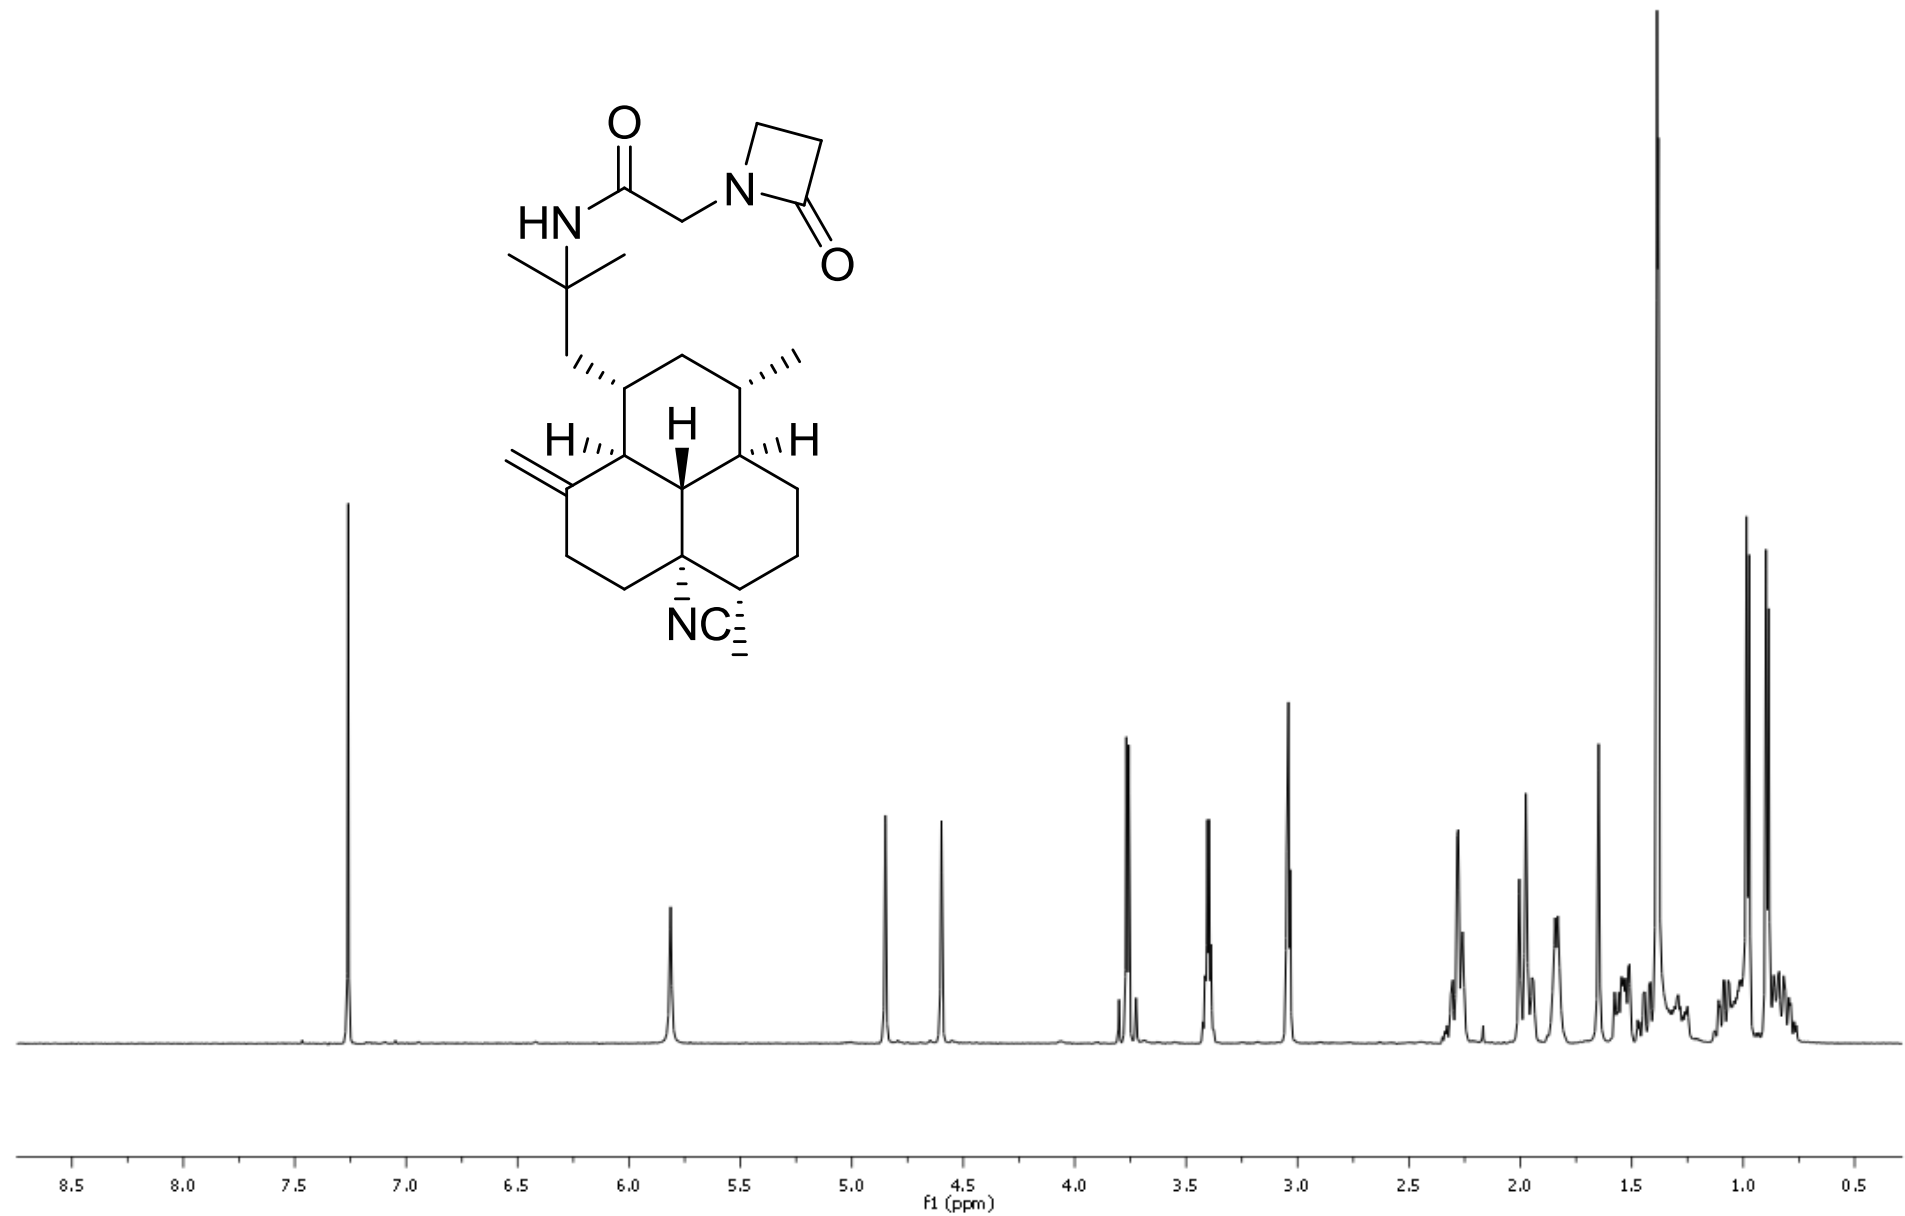

$^{13}\text{C}$ -NMR (125 MHz) spectrum of compound 5 in  $\text{CDCl}_3$

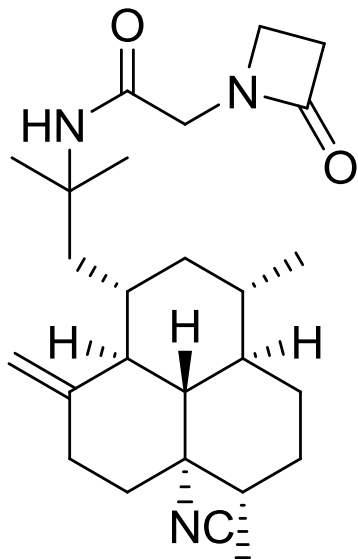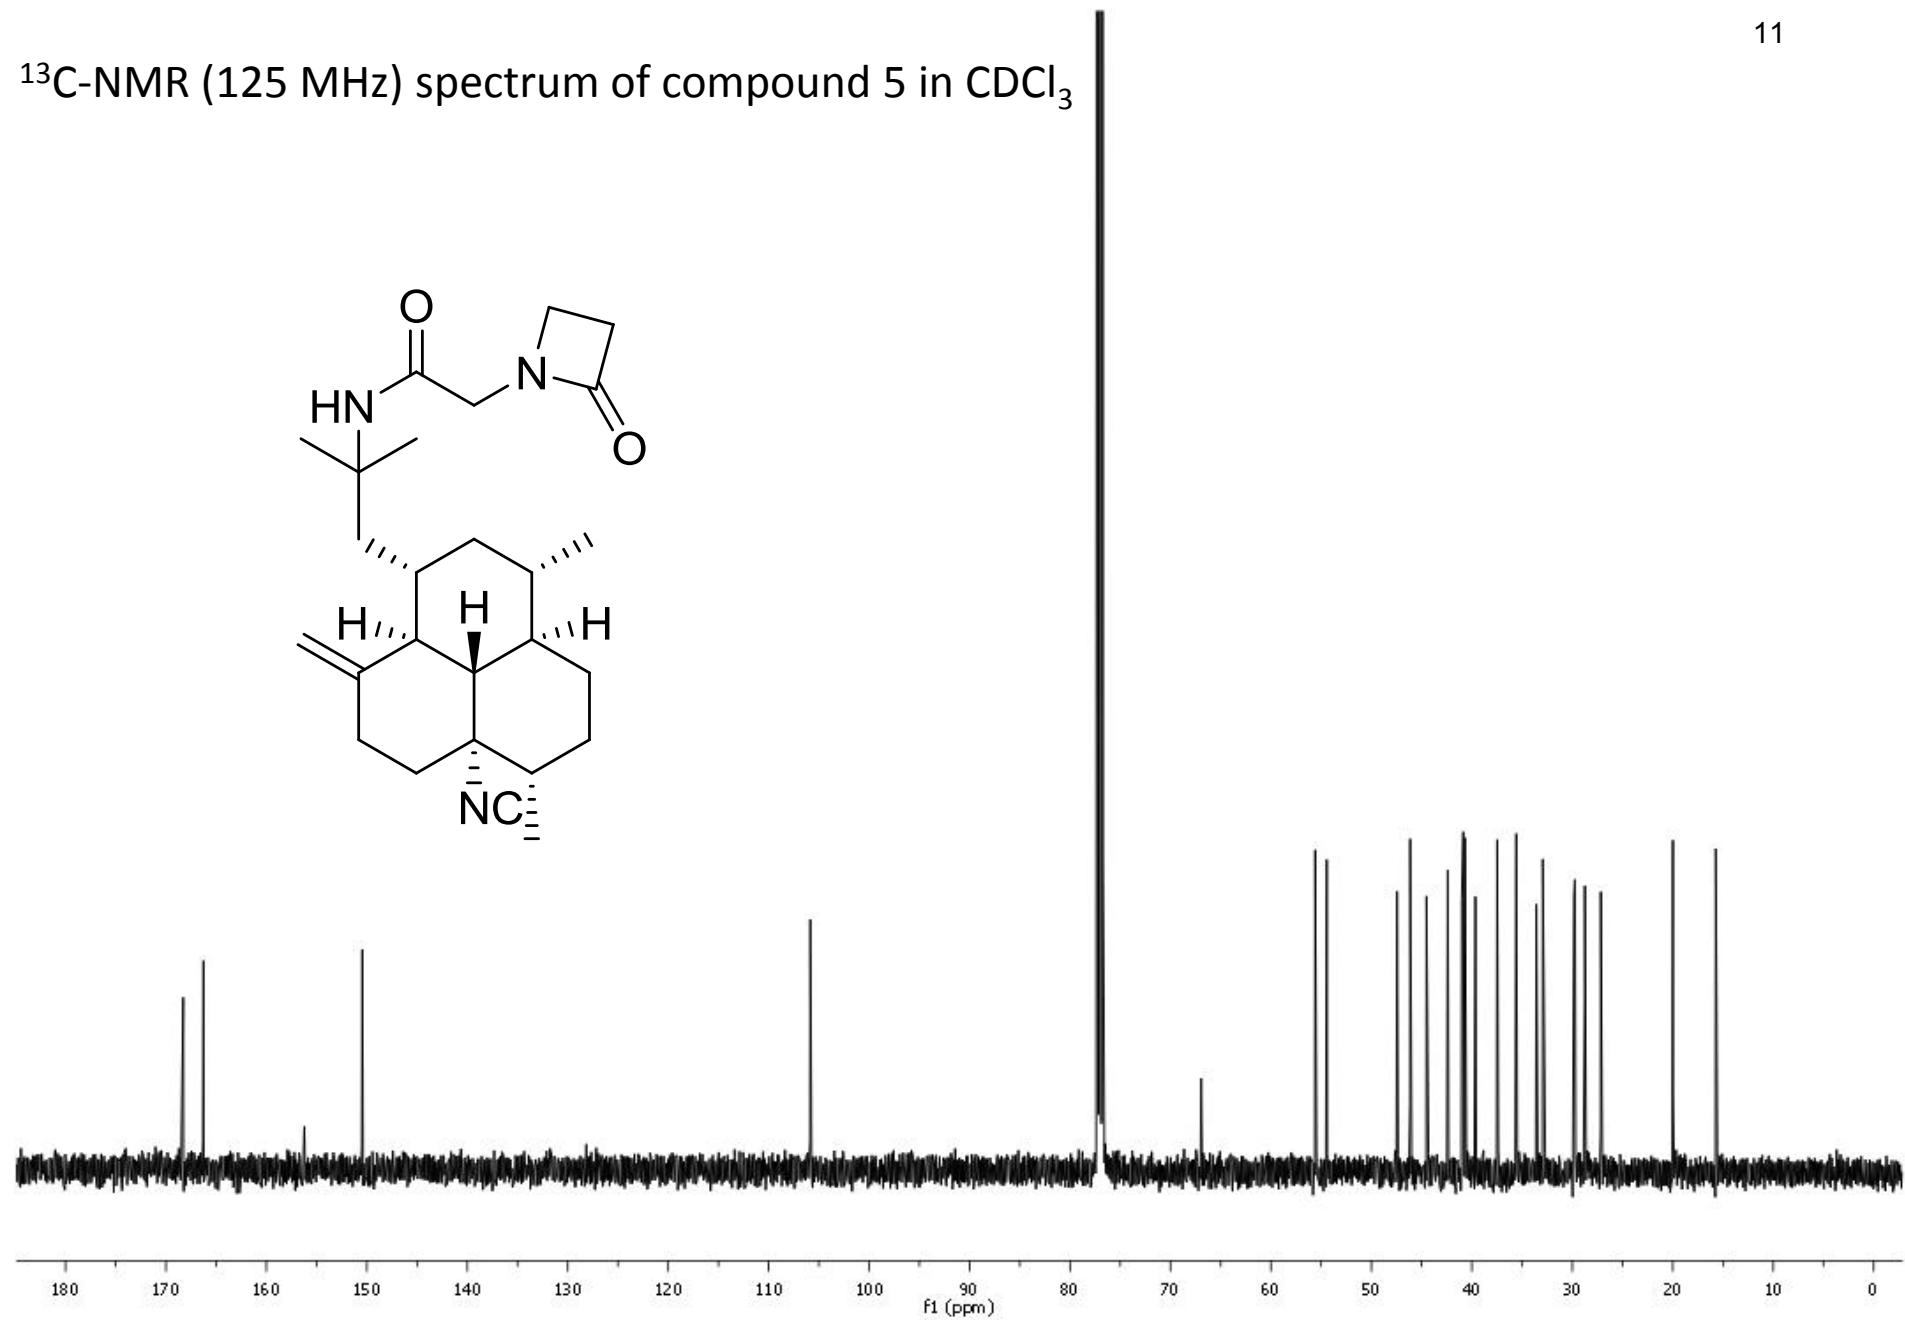

$^1\text{H-NMR}$  (500 MHz) of compound 6 in  $\text{CDCl}_3$

12

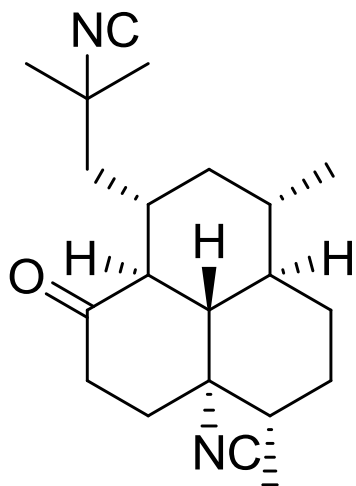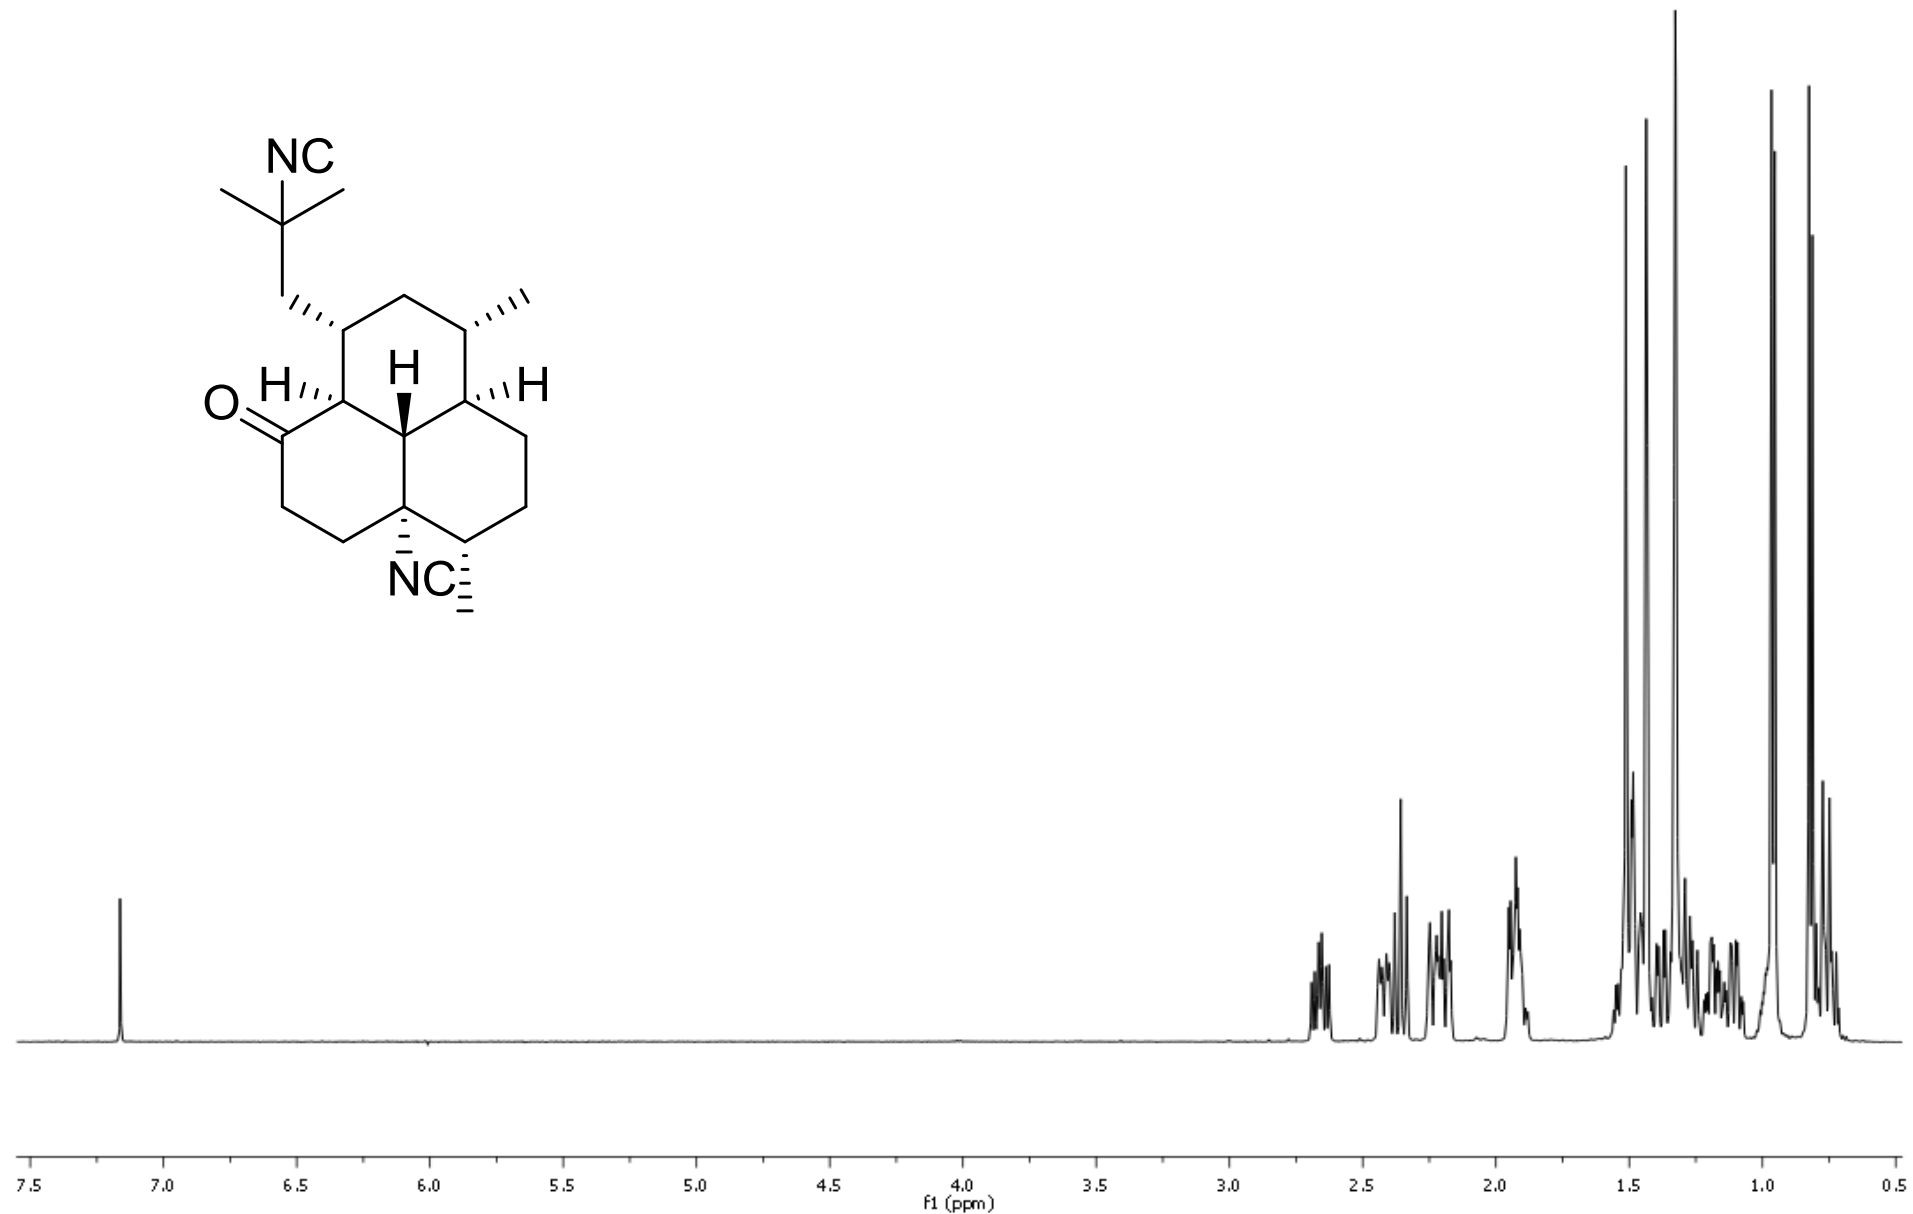

$^{13}\text{C}$ -NMR (125 MHz) spectrum of compound 6 in  $\text{CDCl}_3$

13

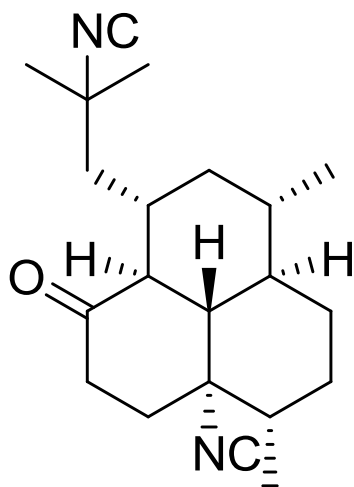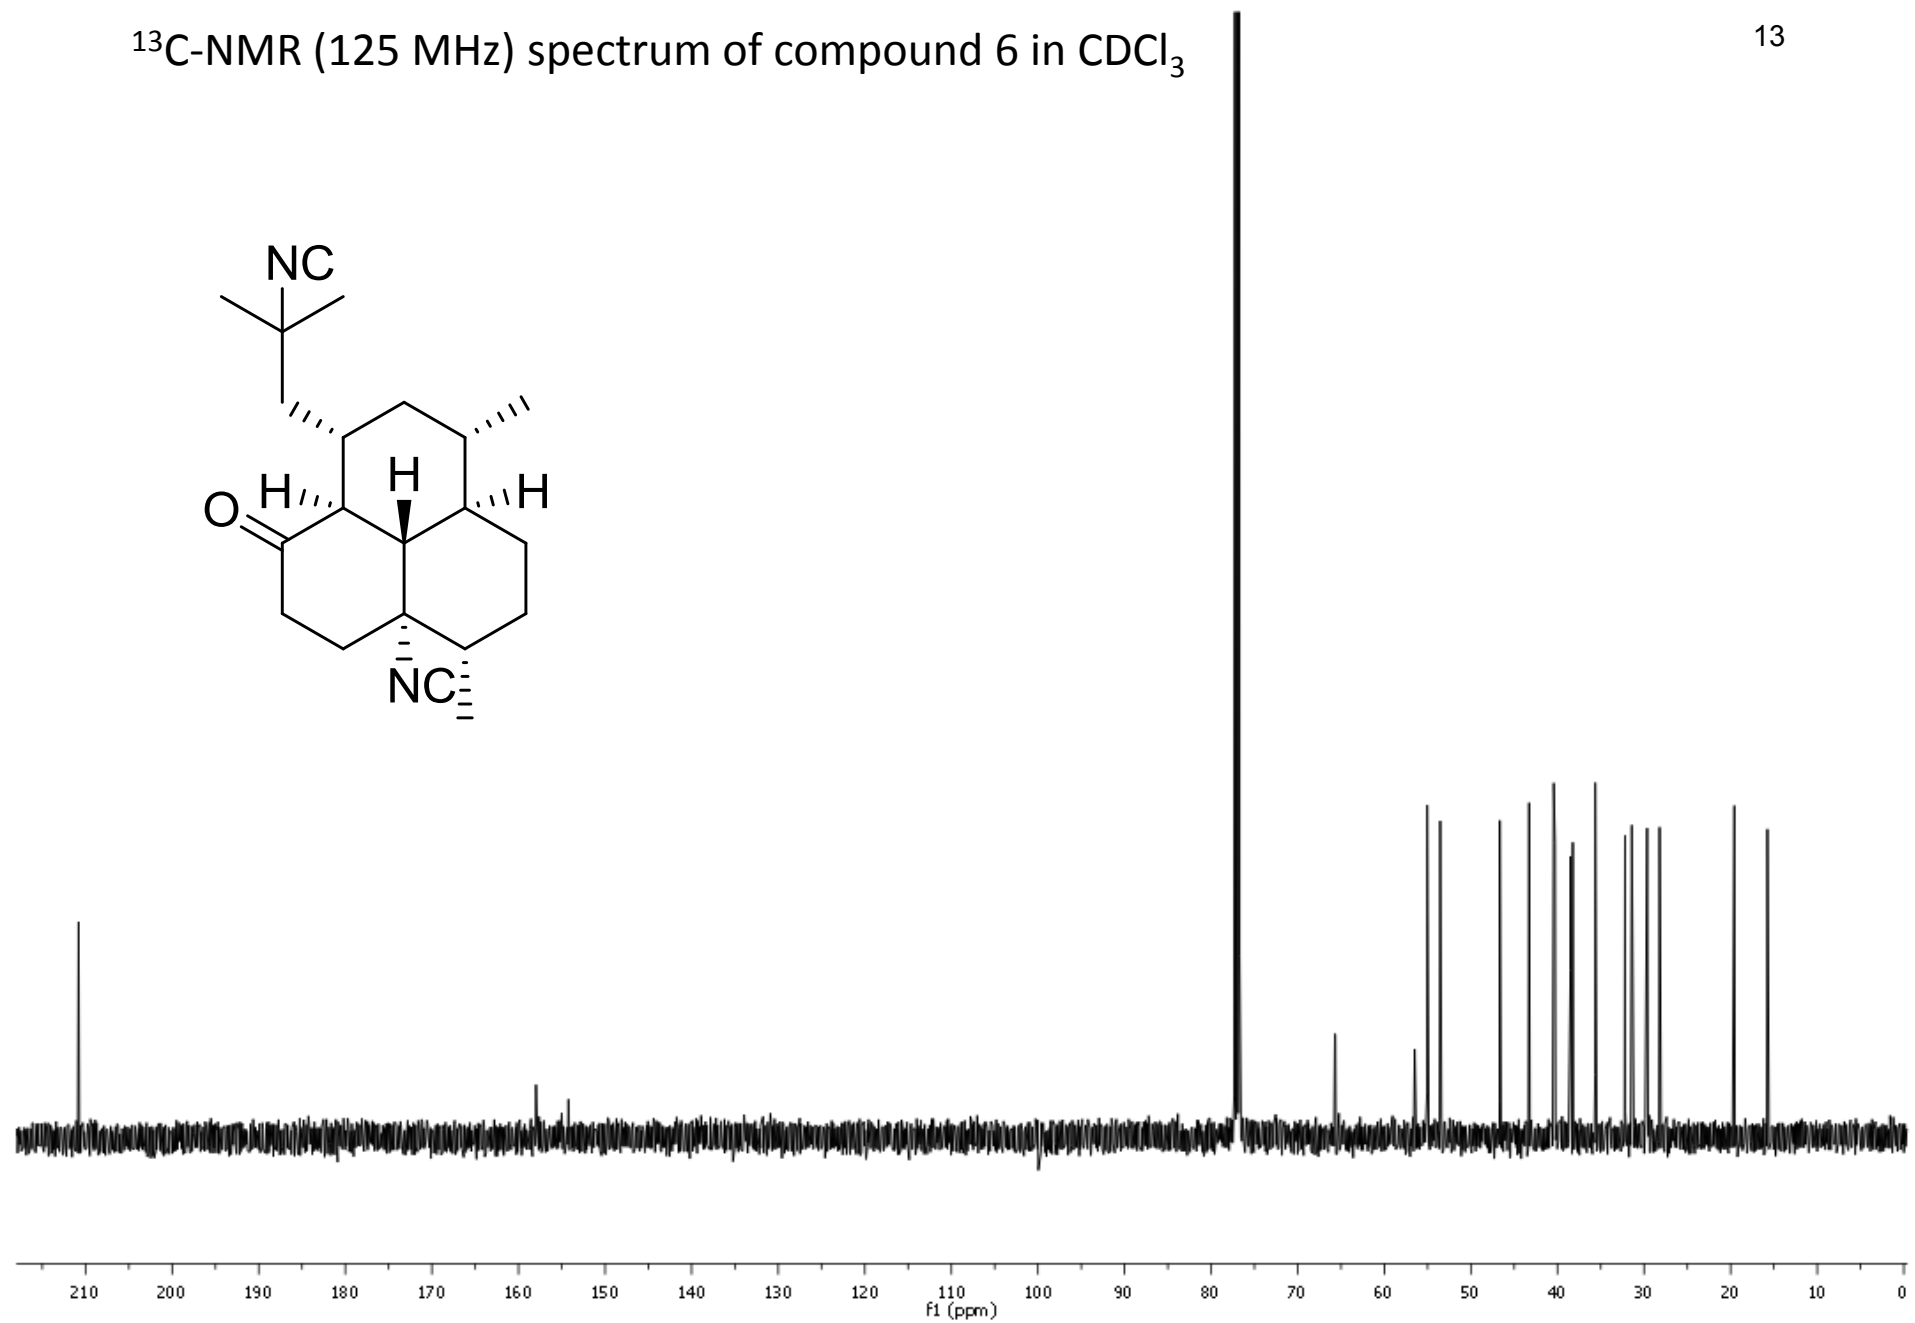

$^1\text{H-NMR}$  (500 MHz) of compound 7 in  $\text{CDCl}_3$

14

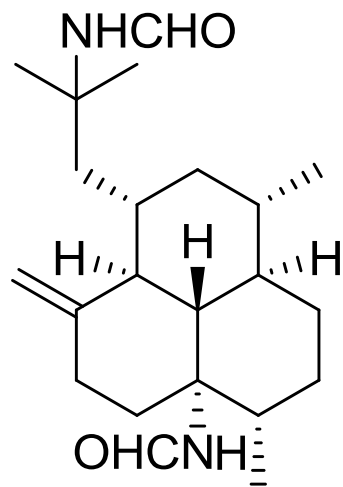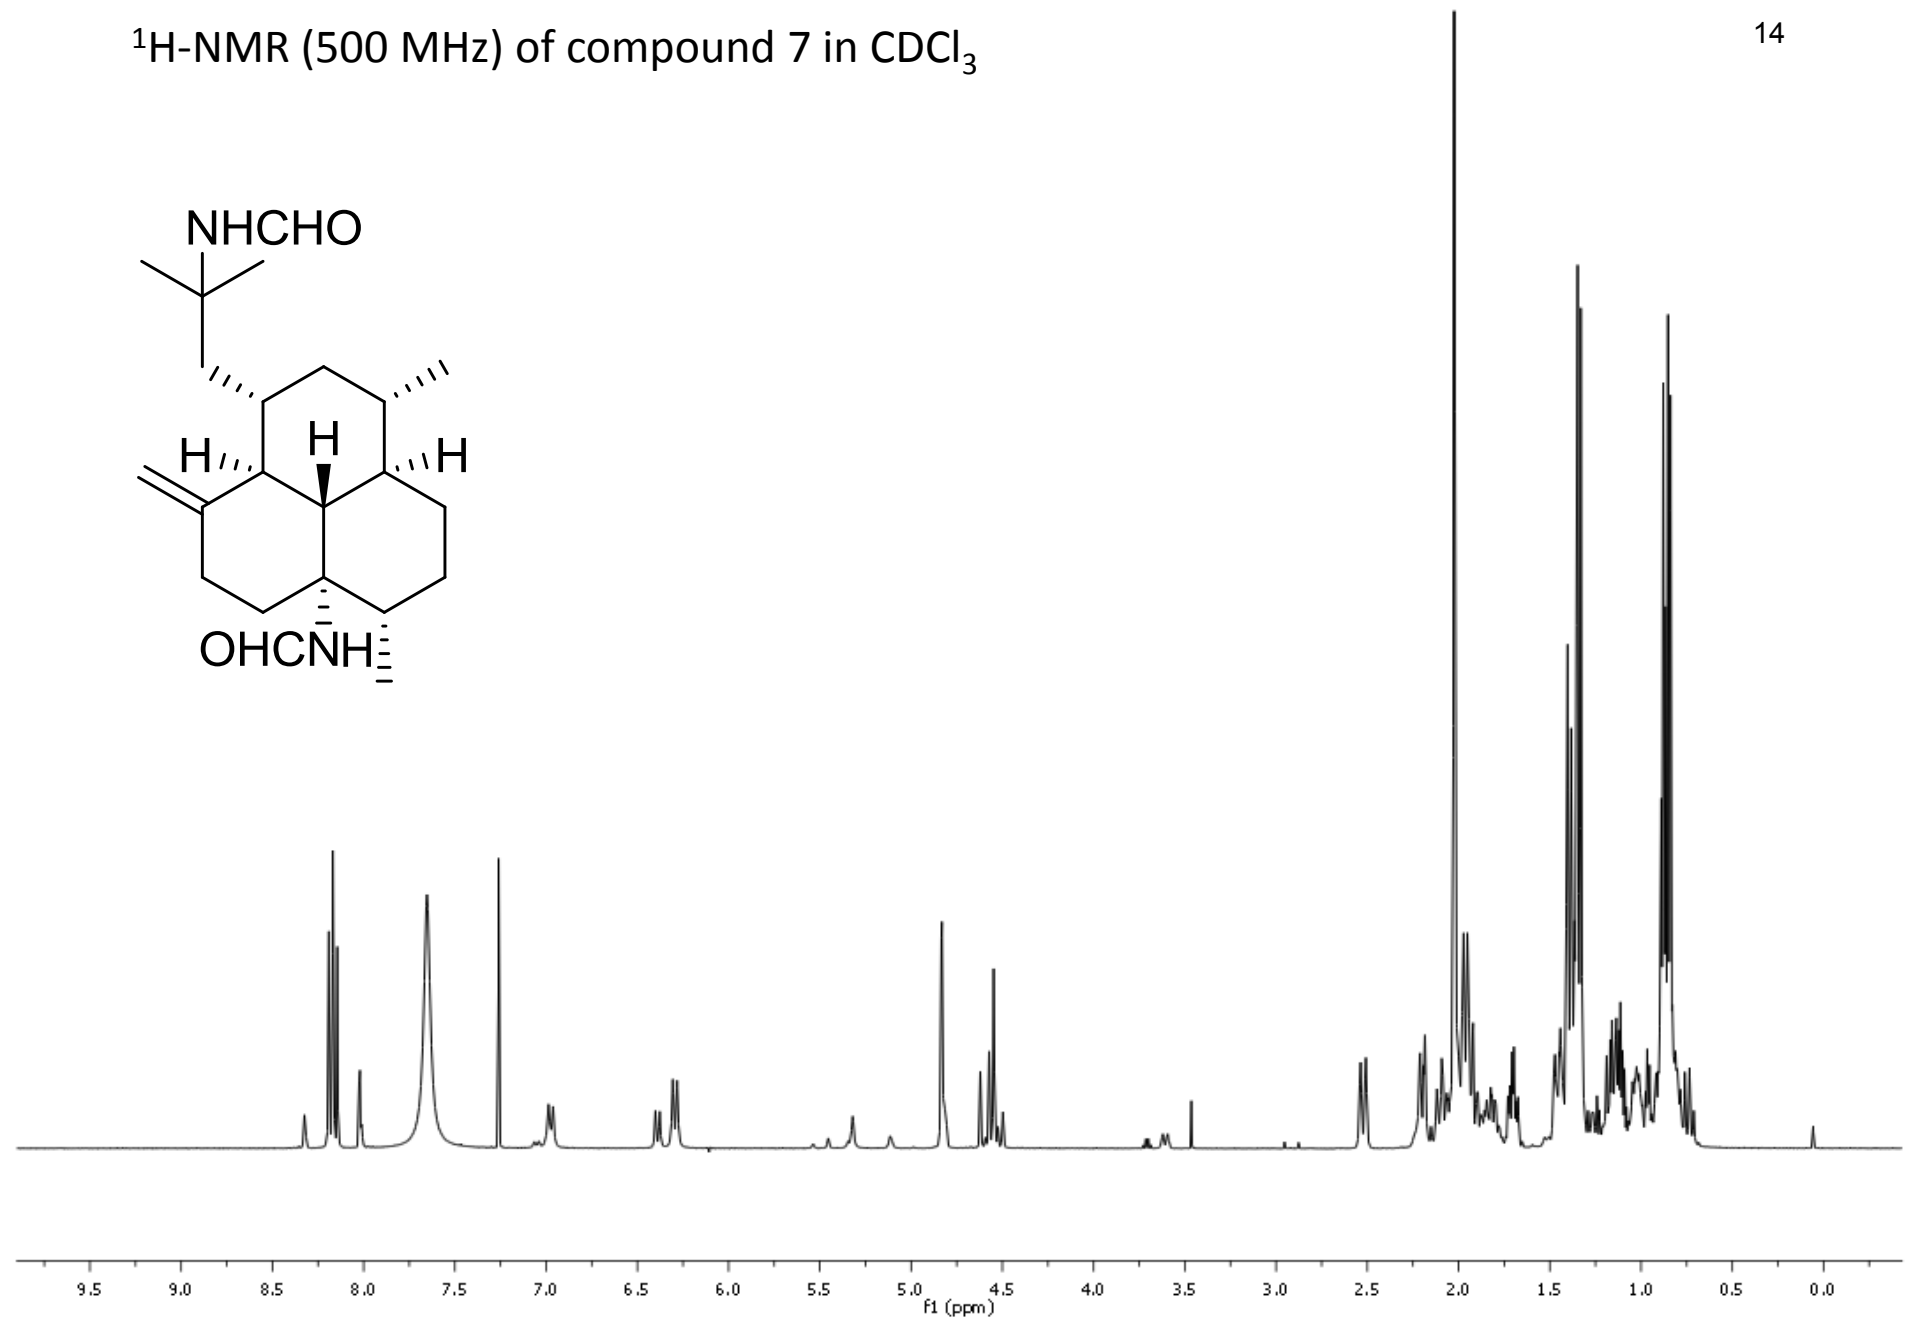

$^{13}\text{C}$ -NMR (125 MHz) spectrum of compound 7 in  $\text{CDCl}_3$

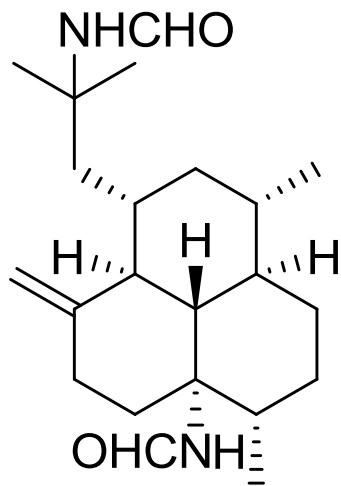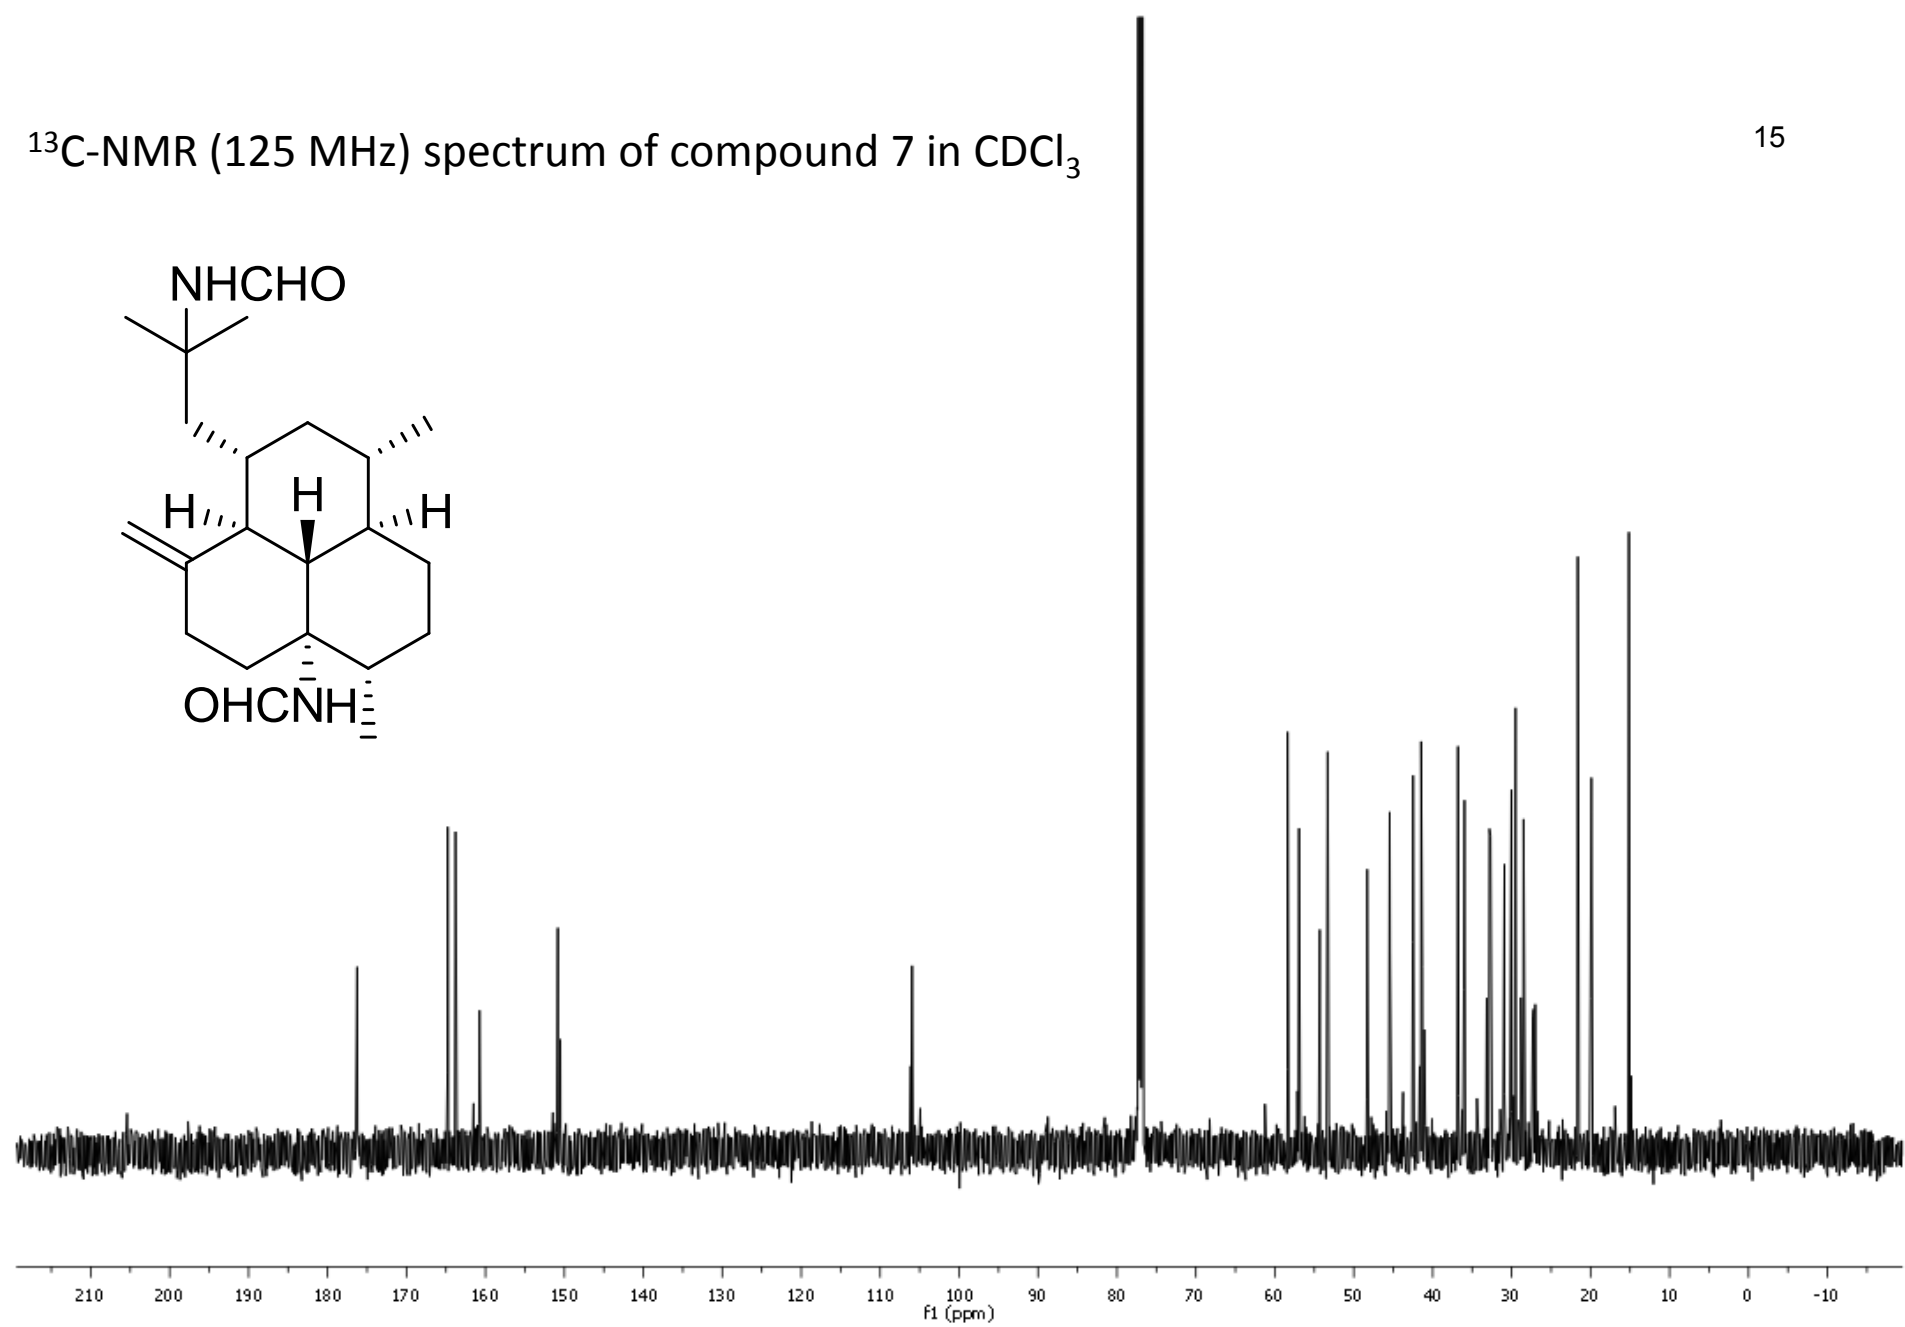

Expansion of the  $^{13}\text{C}$ -NMR (125 MHz) spectrum of compound 7 in  $\text{CDCl}_3$  16

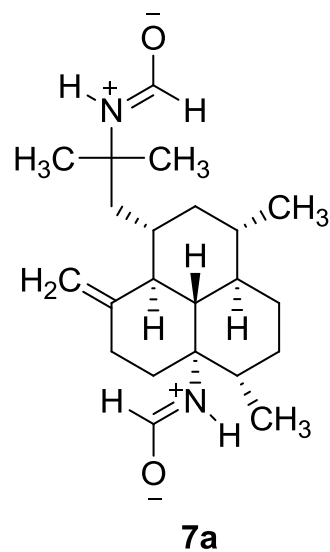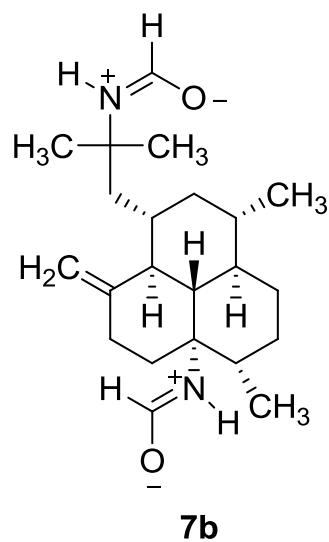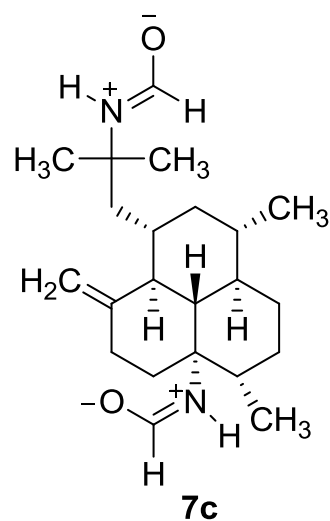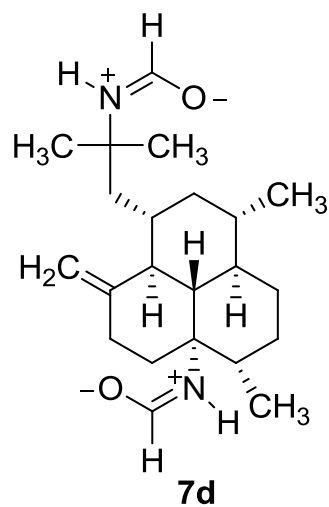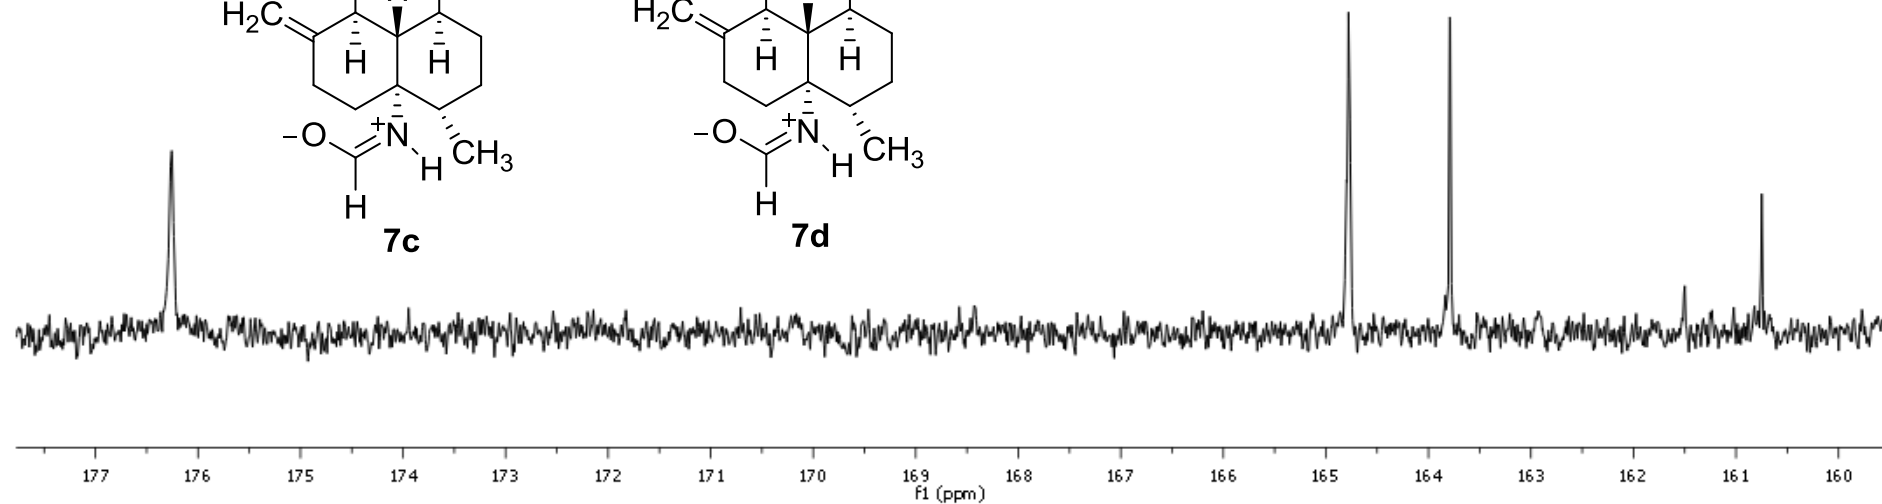



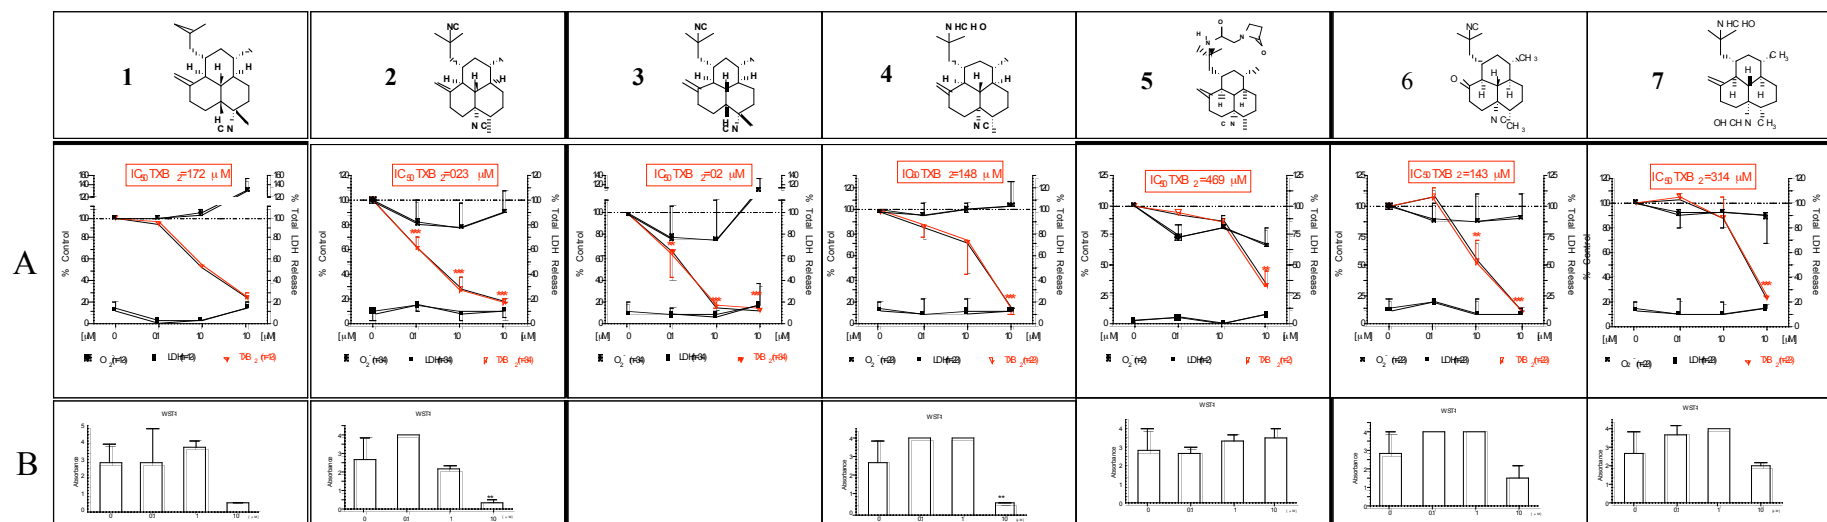

**Figure 2.** Differential effects of *Hymeniacionon* sp. amphilectane metabolites on PMA (1  $\mu$ M) -stimulated  $O_2^-$  and TXB<sub>2</sub> generation by LPS-activated rat neonatal microglia. (A) Rat neonatal microglia (200,000 cells/well) were activated with LPS (0.3 ng/mL) for 17 h. Compounds 1-7 were added 15 min before stimulation with PMA (1  $\mu$ M). After 70 min, PMA-triggered  $O_2^-$ , TXB<sub>2</sub> and LDH release (*short-term* viability) were measured as described in Methods. Data are expressed as percentage of control  $O_2^-$  and TXB<sub>2</sub> release triggered by PMA. Data show mean  $\pm$  SEM of 2-4 independent experiments. \*\* P < 0.01, \*\*\* P < 0.001. (B) *Long-term* cell viability (2.5-19 h) was determined by the WST-1 assay as described in Methods. Briefly, rat neonatal microglia (10,000 cells/well) plated in LPS-free 96-well cell culture clusters, were treated with compounds 1-7 (0.1  $\mu$ M – 10  $\mu$ M) or vehicle (DMSO). After 18 h, 20  $\mu$ L of the tetrazolium salt WST-1 was added, plates were incubated at 36 $^\circ$  C for 2 h, and reduction of the WST-1 reagent to formazan was measured at 450 nm. Data for compounds 1-7 are from one representative experiment in triplicate. \* P < 0.05, \*\* P < 0.01.
